# Supplementary material
Source: MDPI journal article supplement (https://www.mdpi.com/search?q=molecules-23-01813)
Supplement: s001 [file molecules-23-01813-s001.pdf]

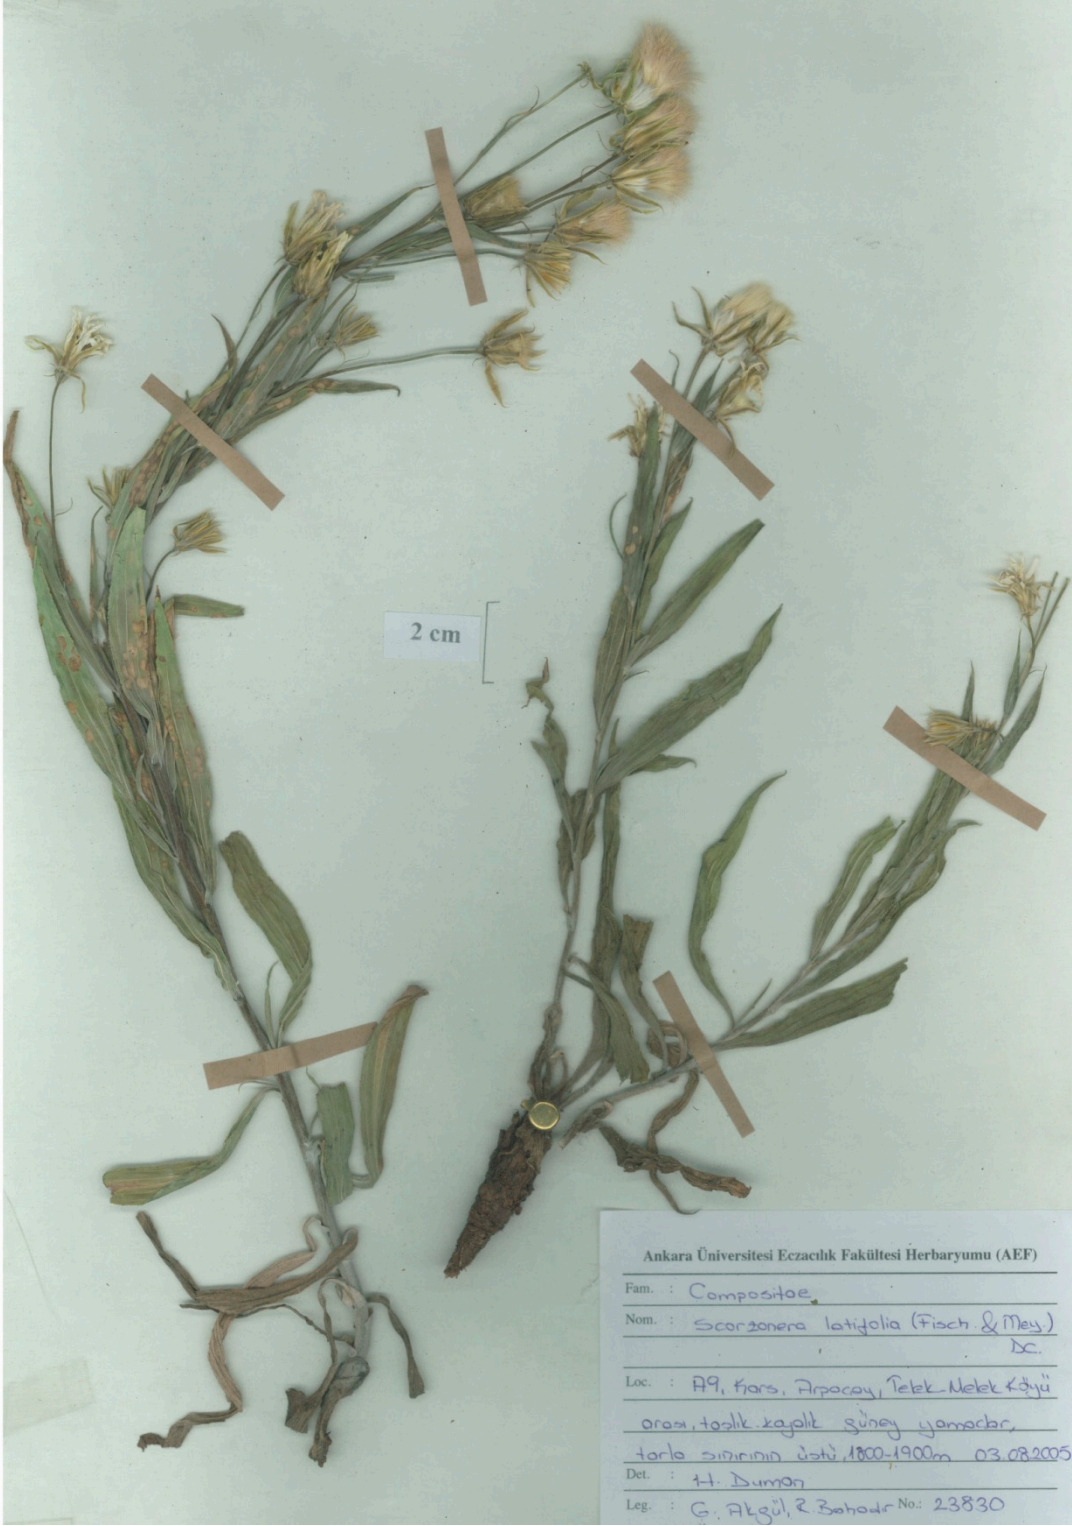

Figure S1: *Scorzonera latifolia* (Fisch&Mey) DC.

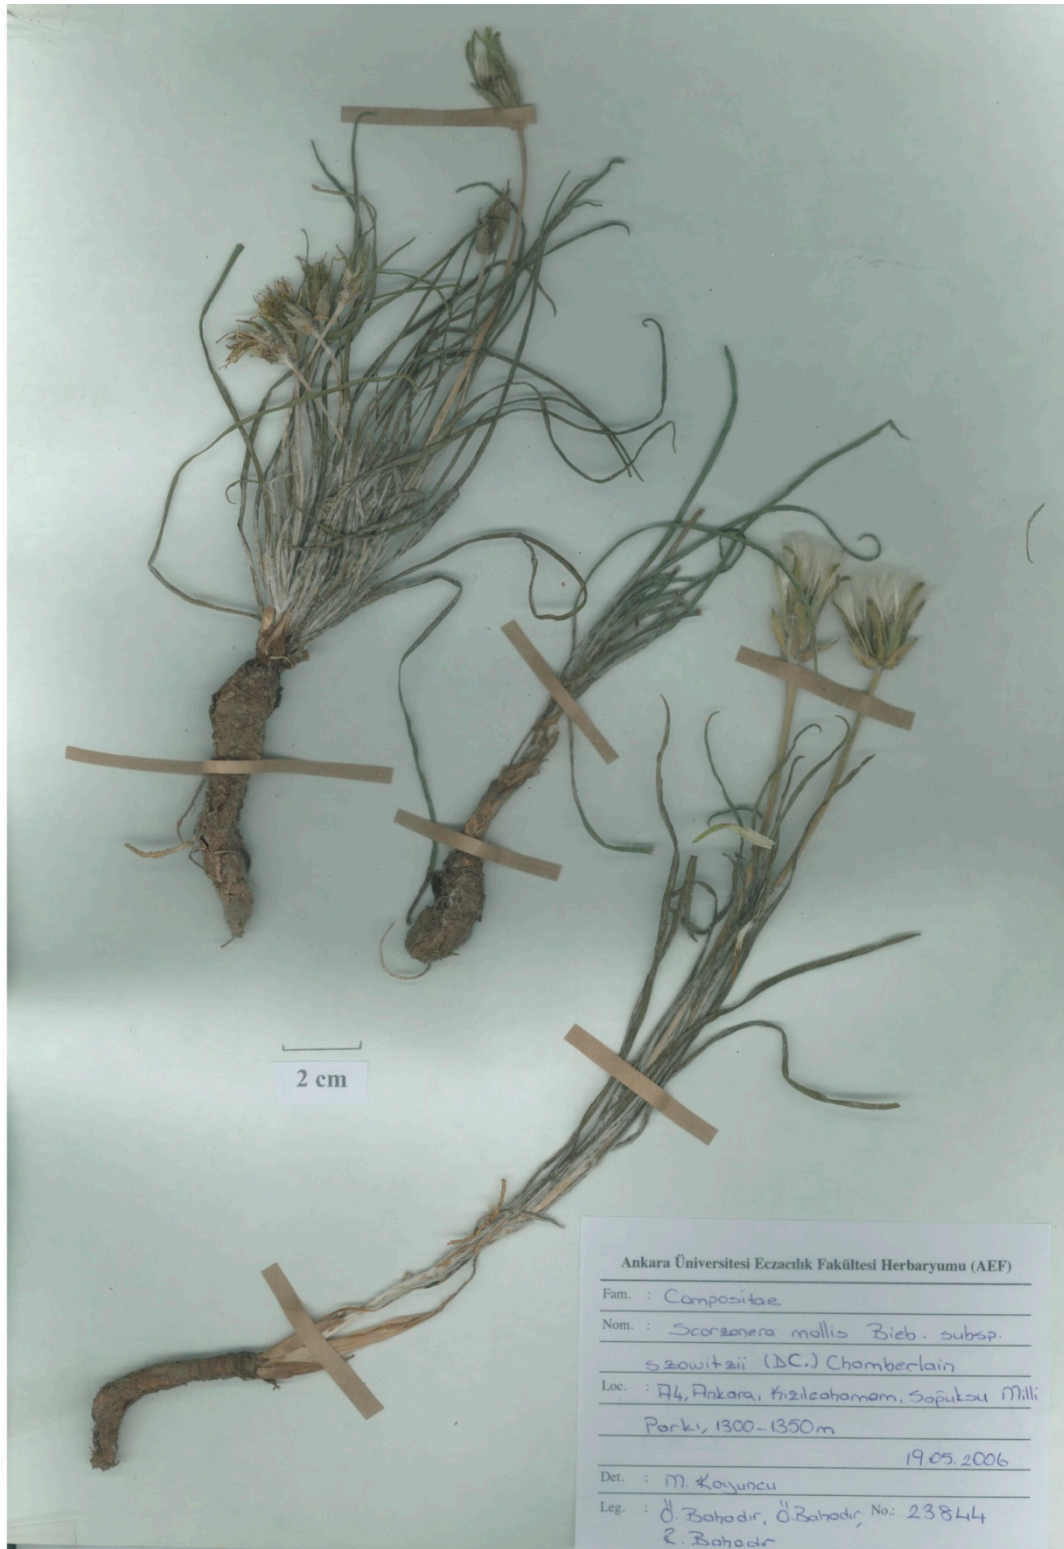

**Figure S2:** *Scorzonera mollis* Bieb. ssp. *szowitsii*



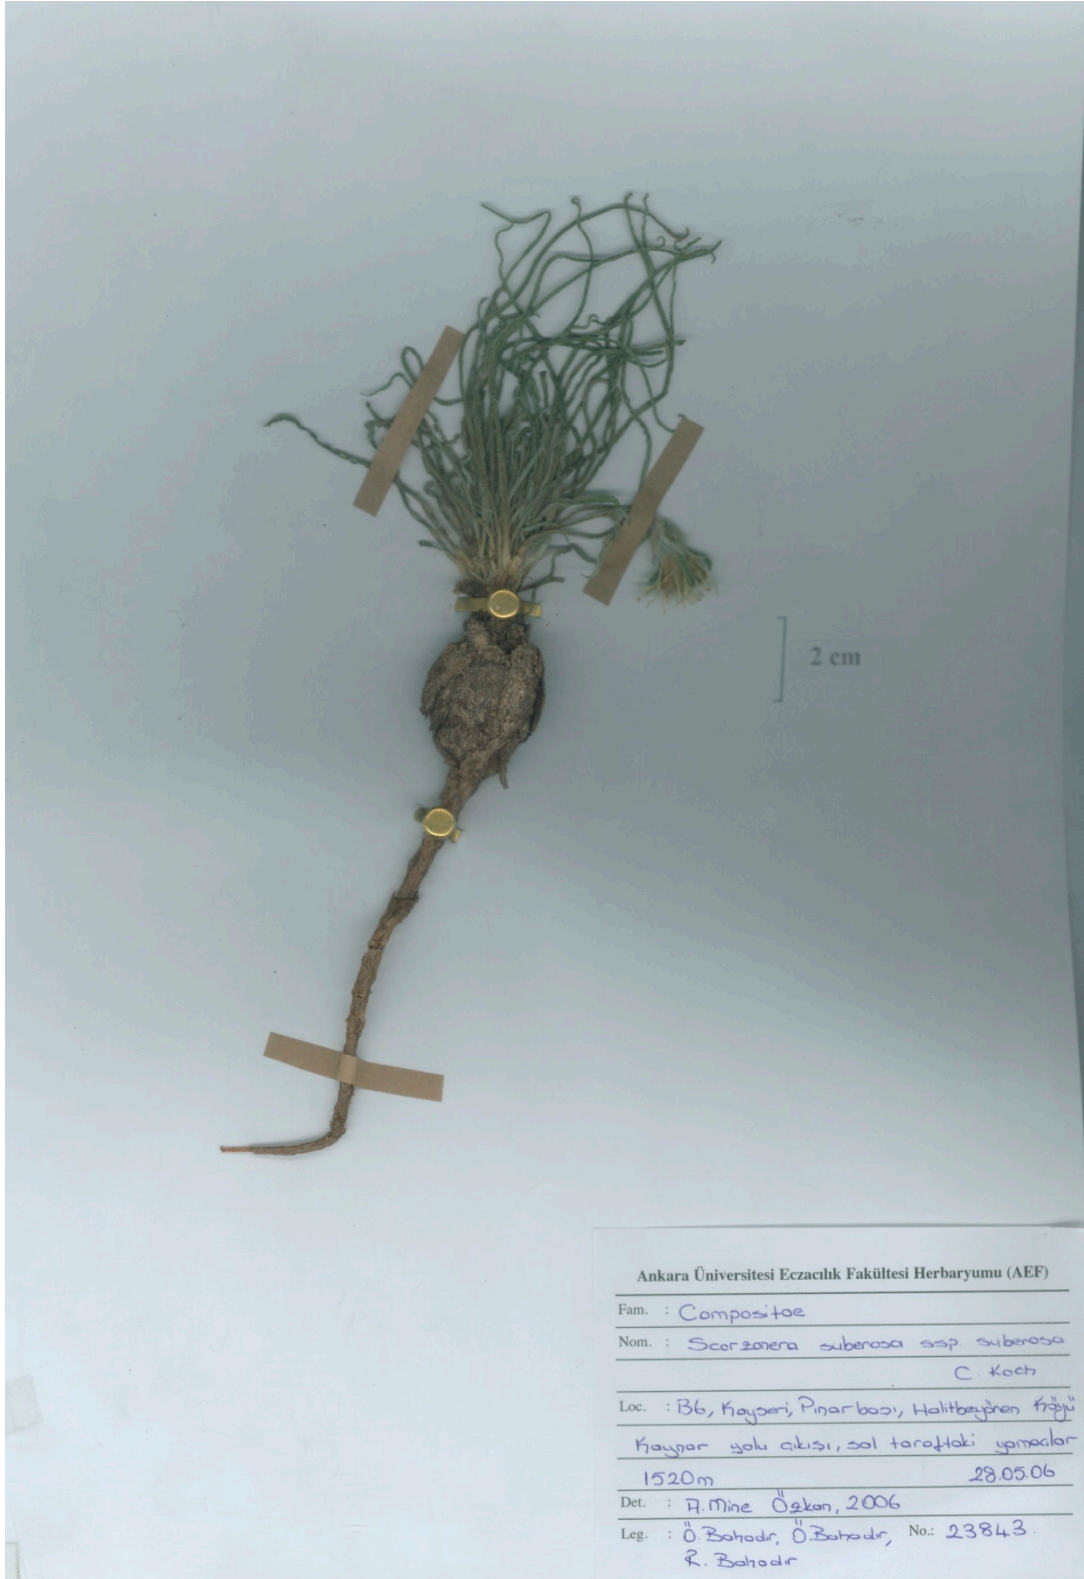

**Figure S3:** *Scorzonera suberosa* ssp. *suberosa* C. Koch

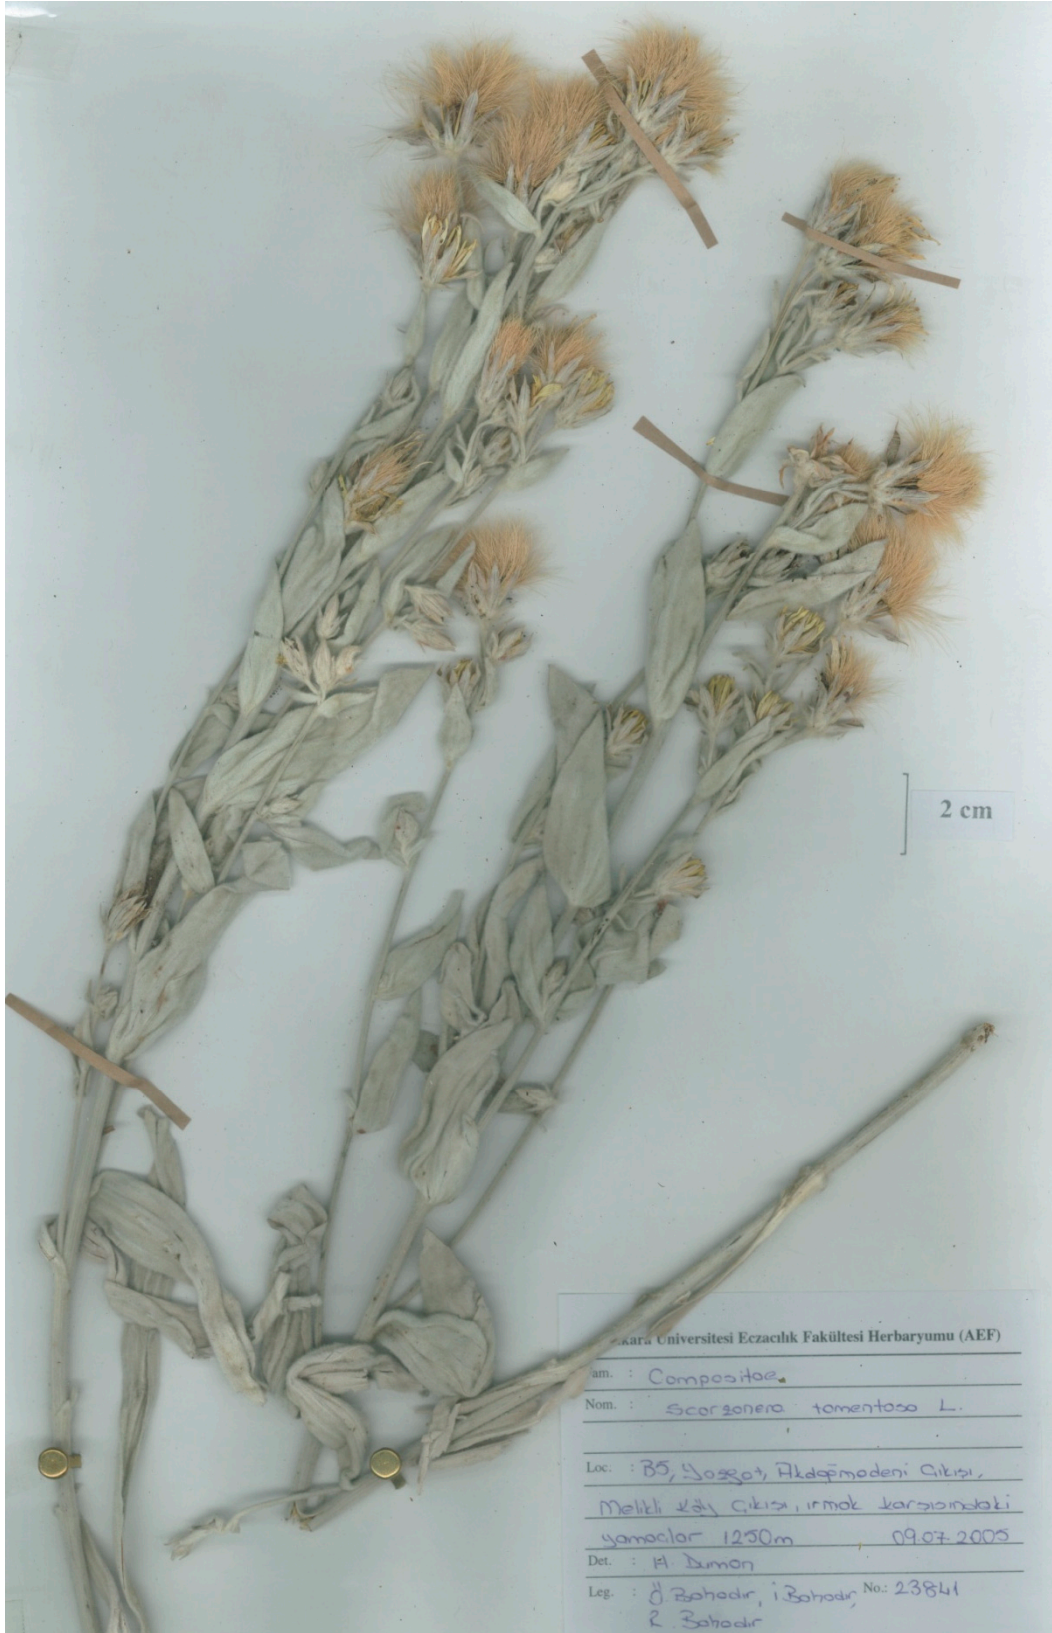

**Figure S4:** *Scorzonera tomentosa* L.



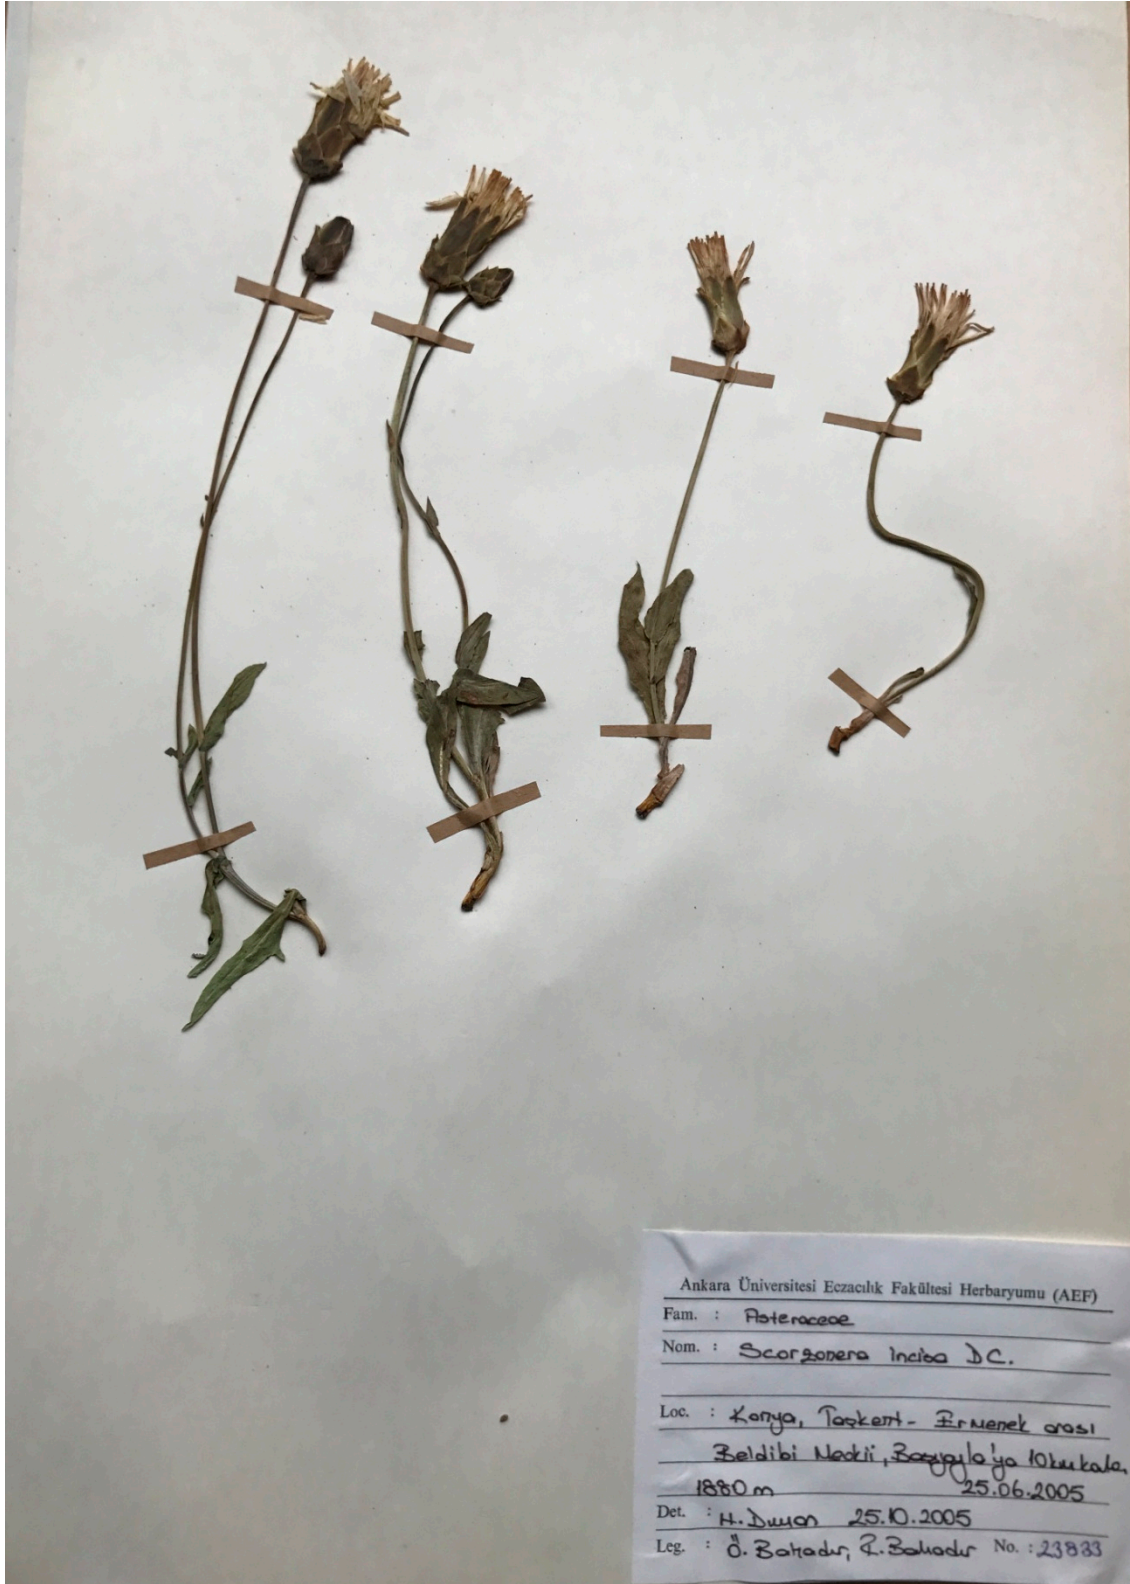

Figure S5: *Scorzonera incisa* DC.

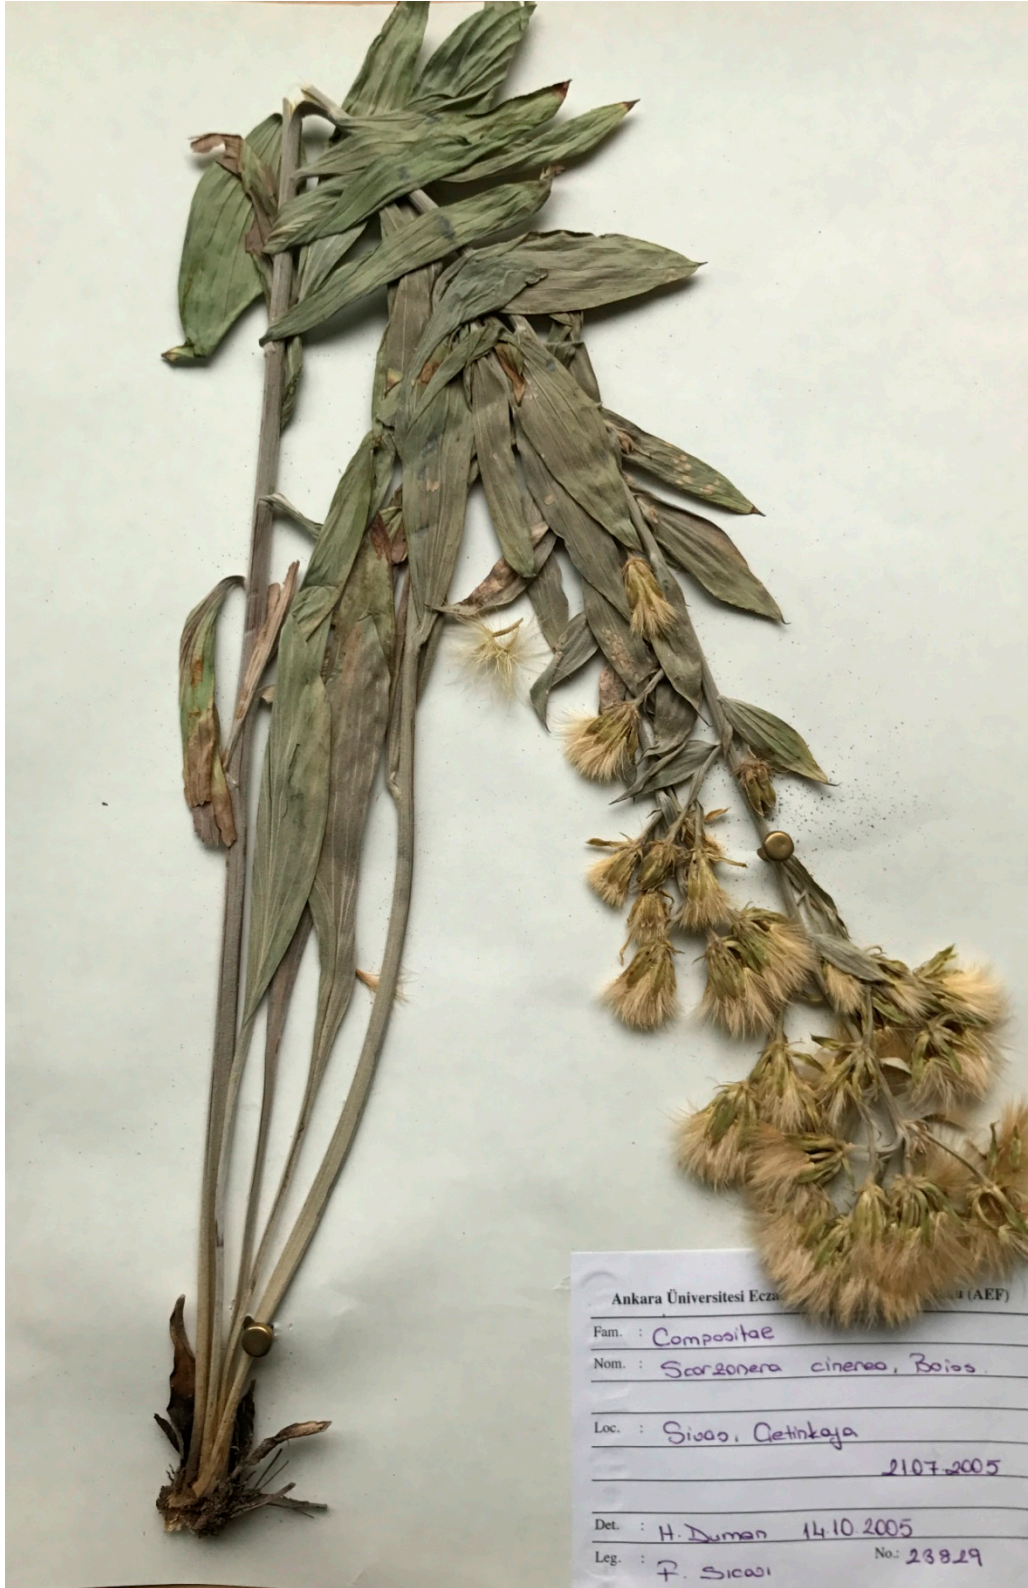

**Figure S6: *Scorzonera cinerea* Boiss.**



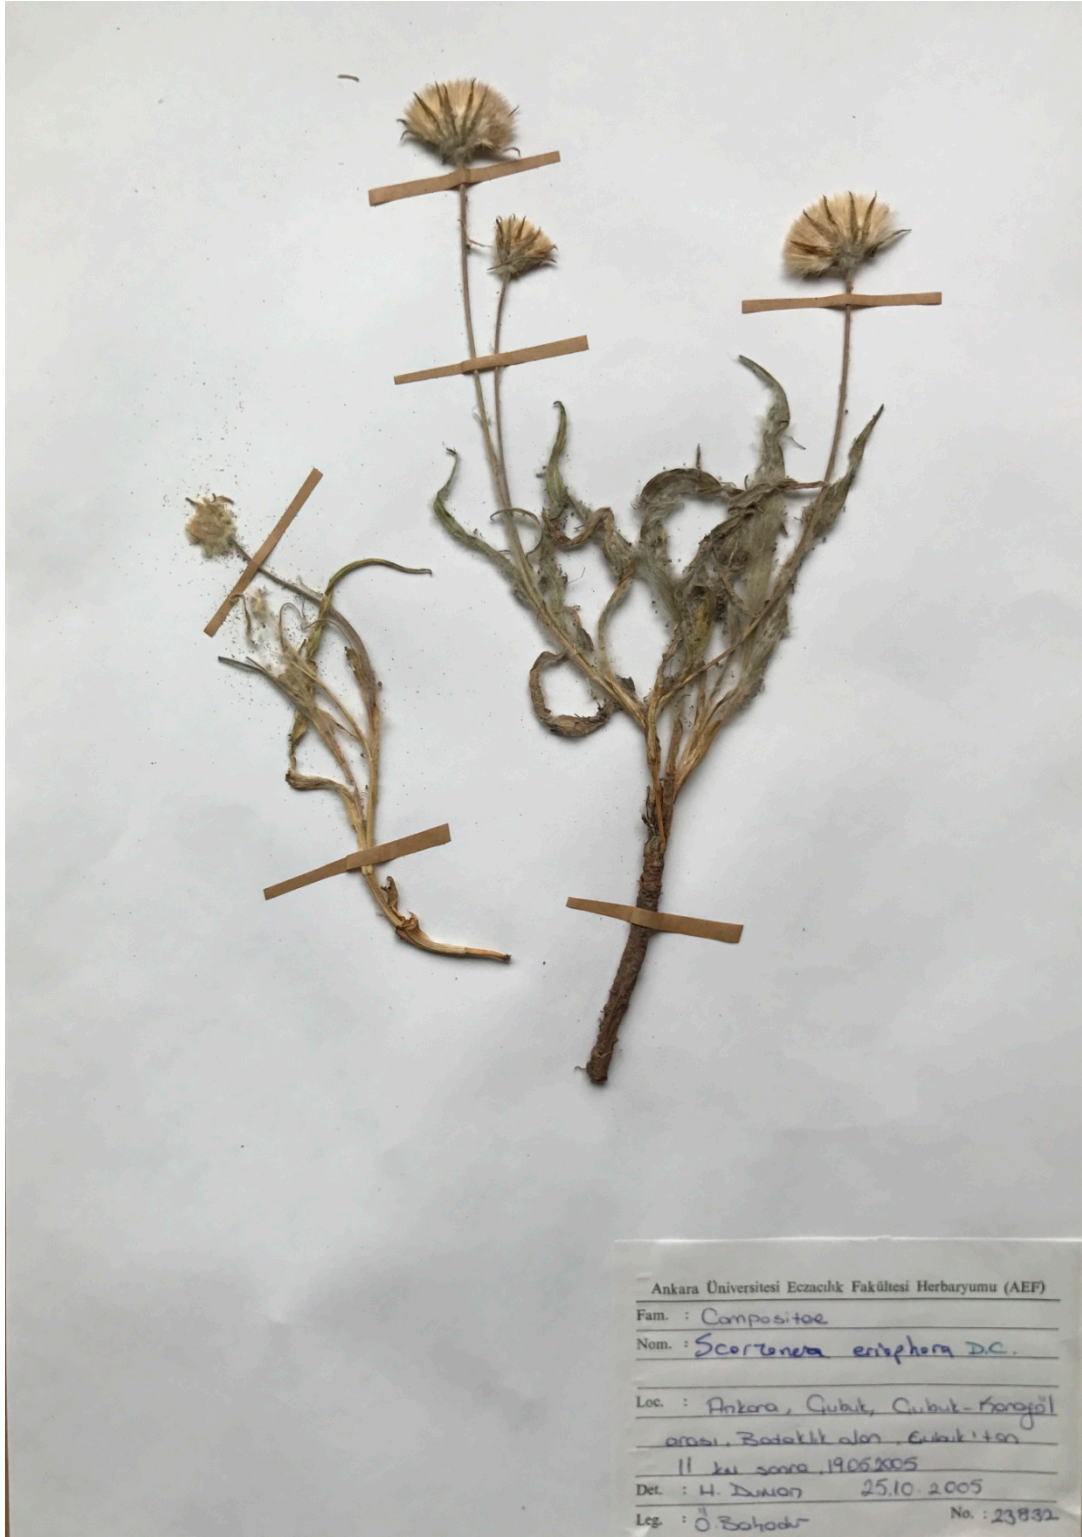

Figure S7: *S. eriophora* DC.

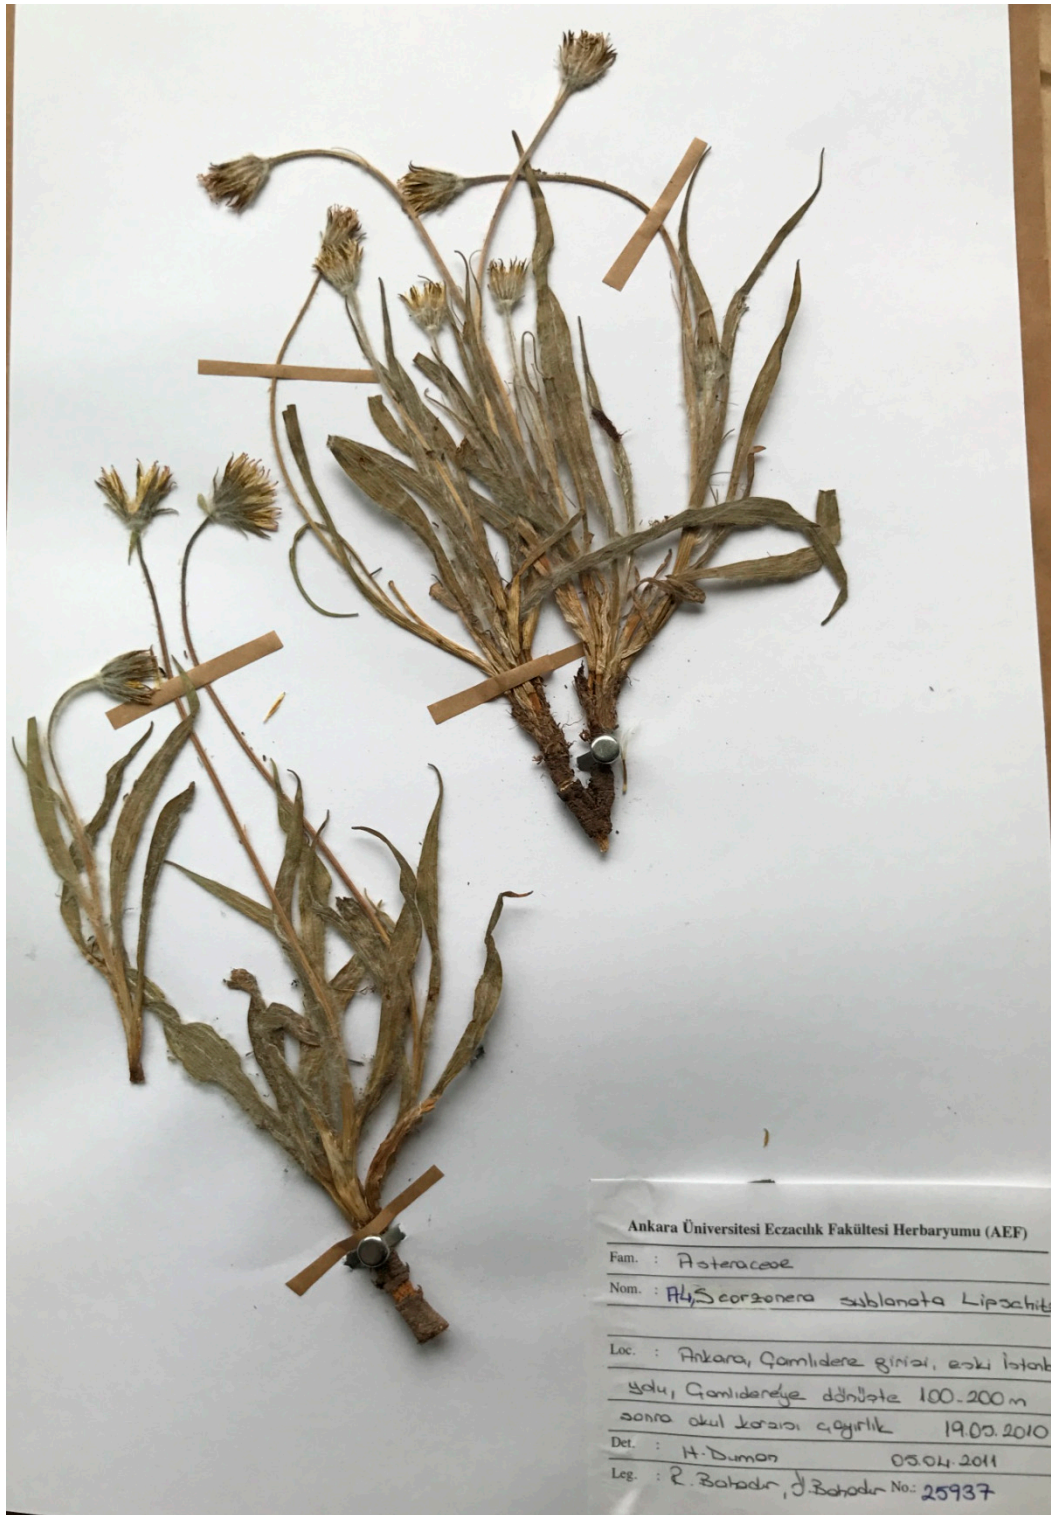

Figure S8: *Scorzonera sublanata* Lipschitz



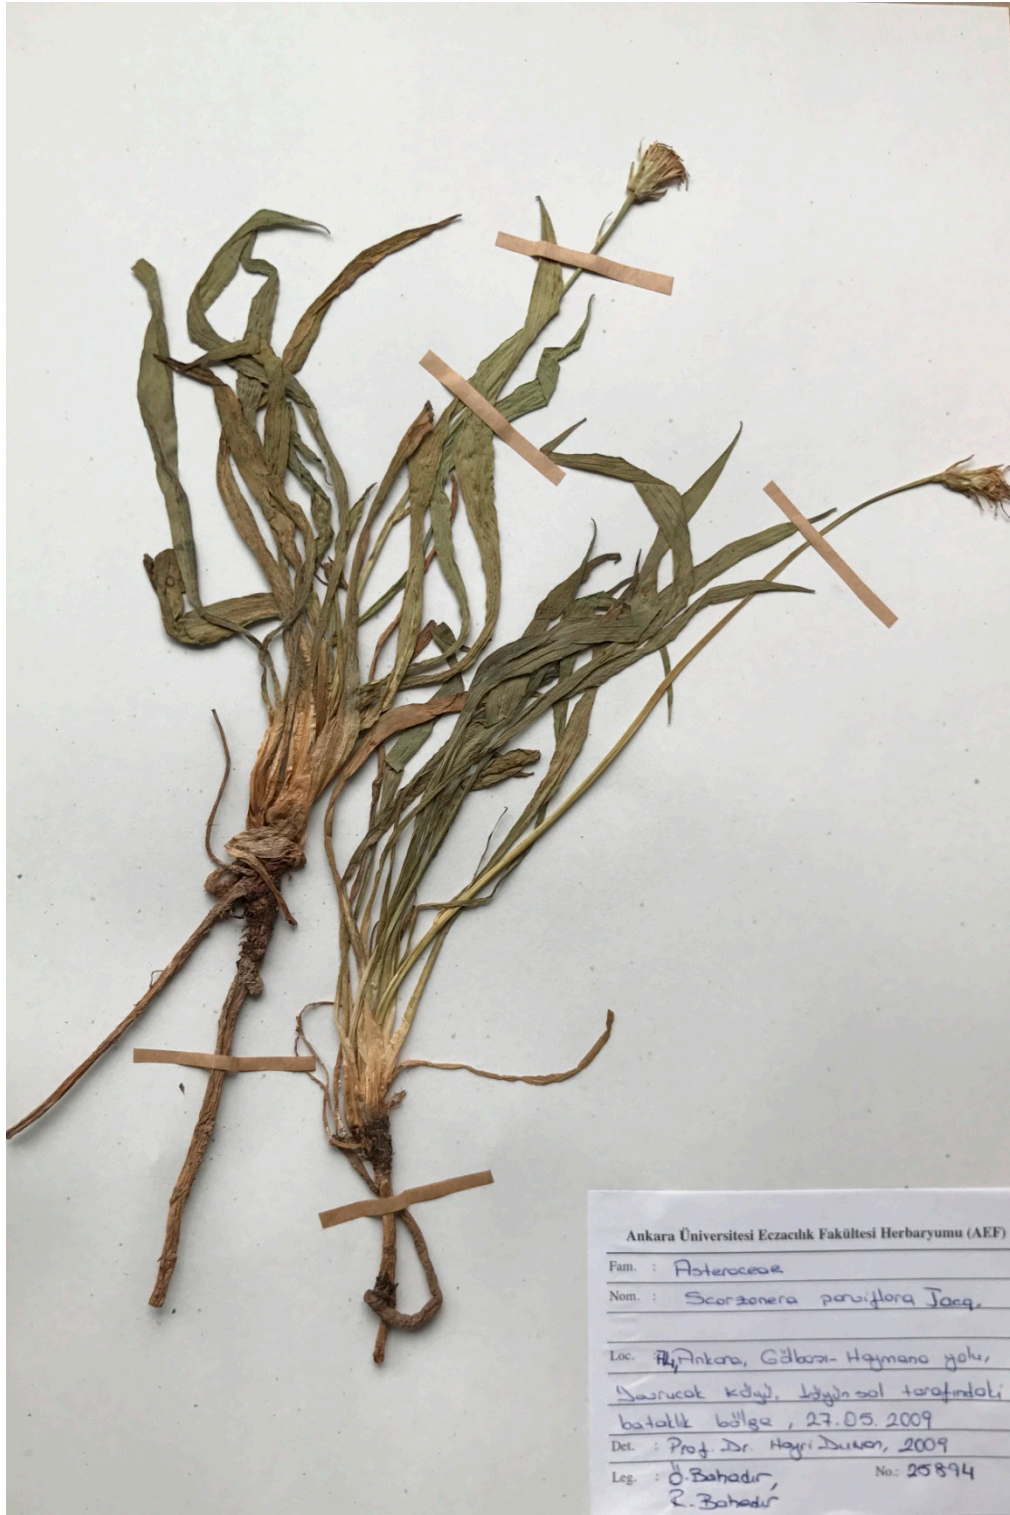

**Figure S9: *Scorzonera parviflora* Jacq.**

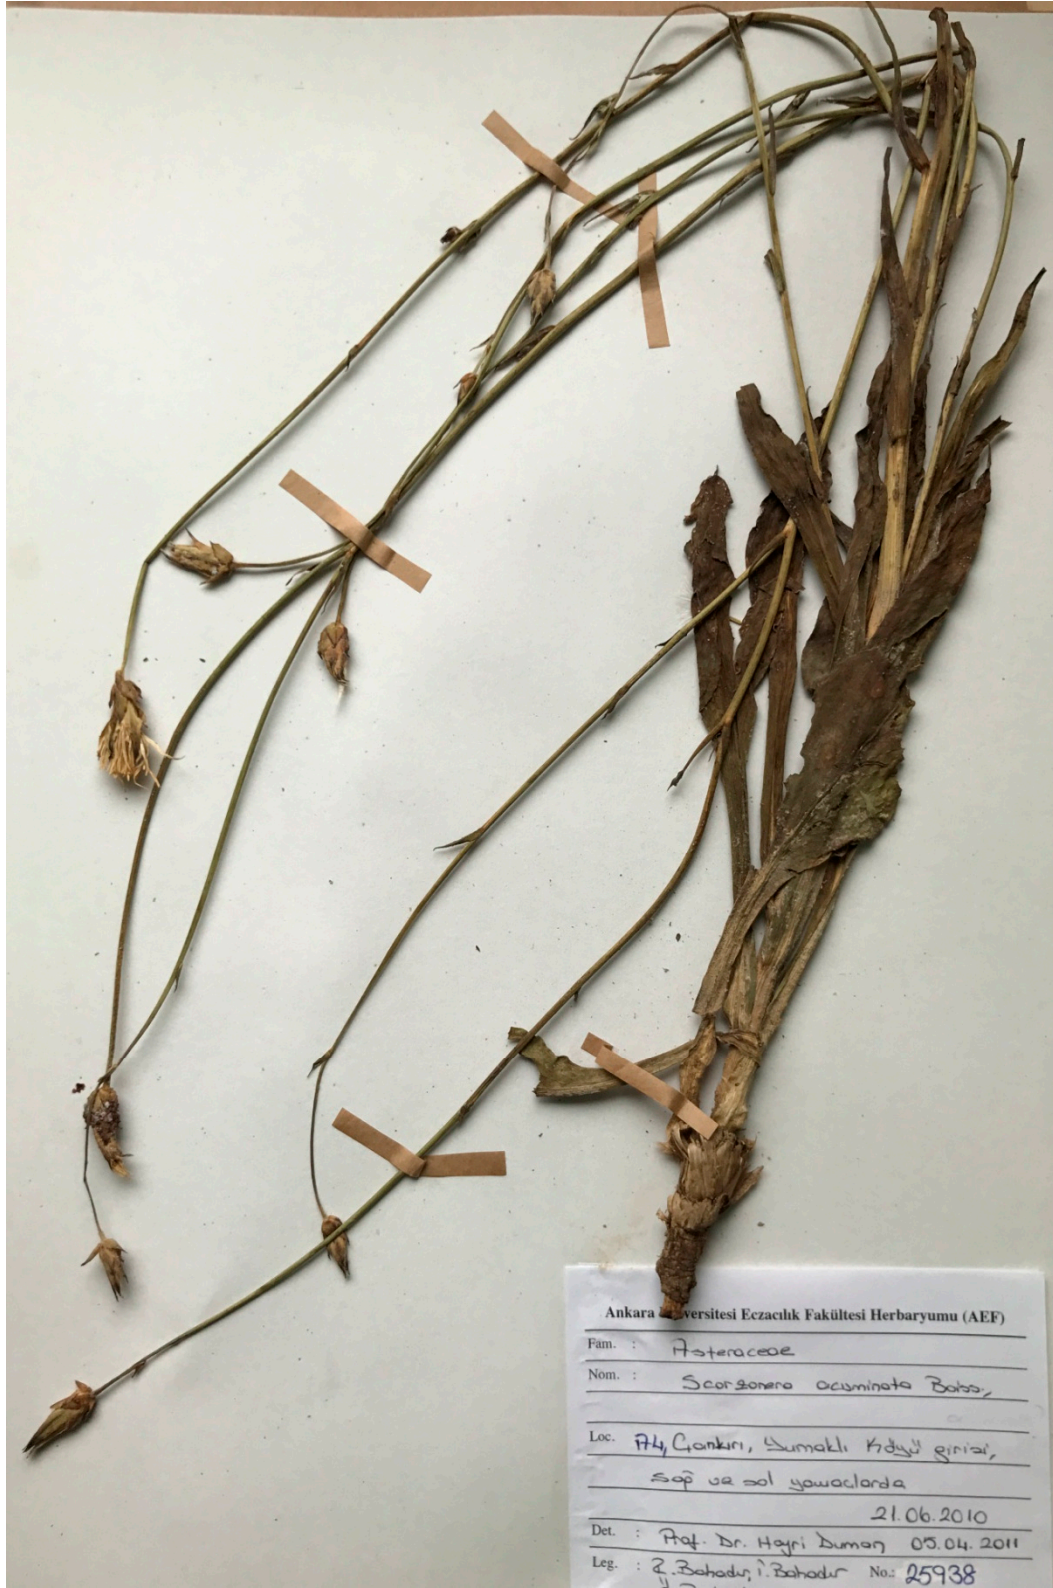

**Figure S10: *Scorzonera acuminata* Boiss.**



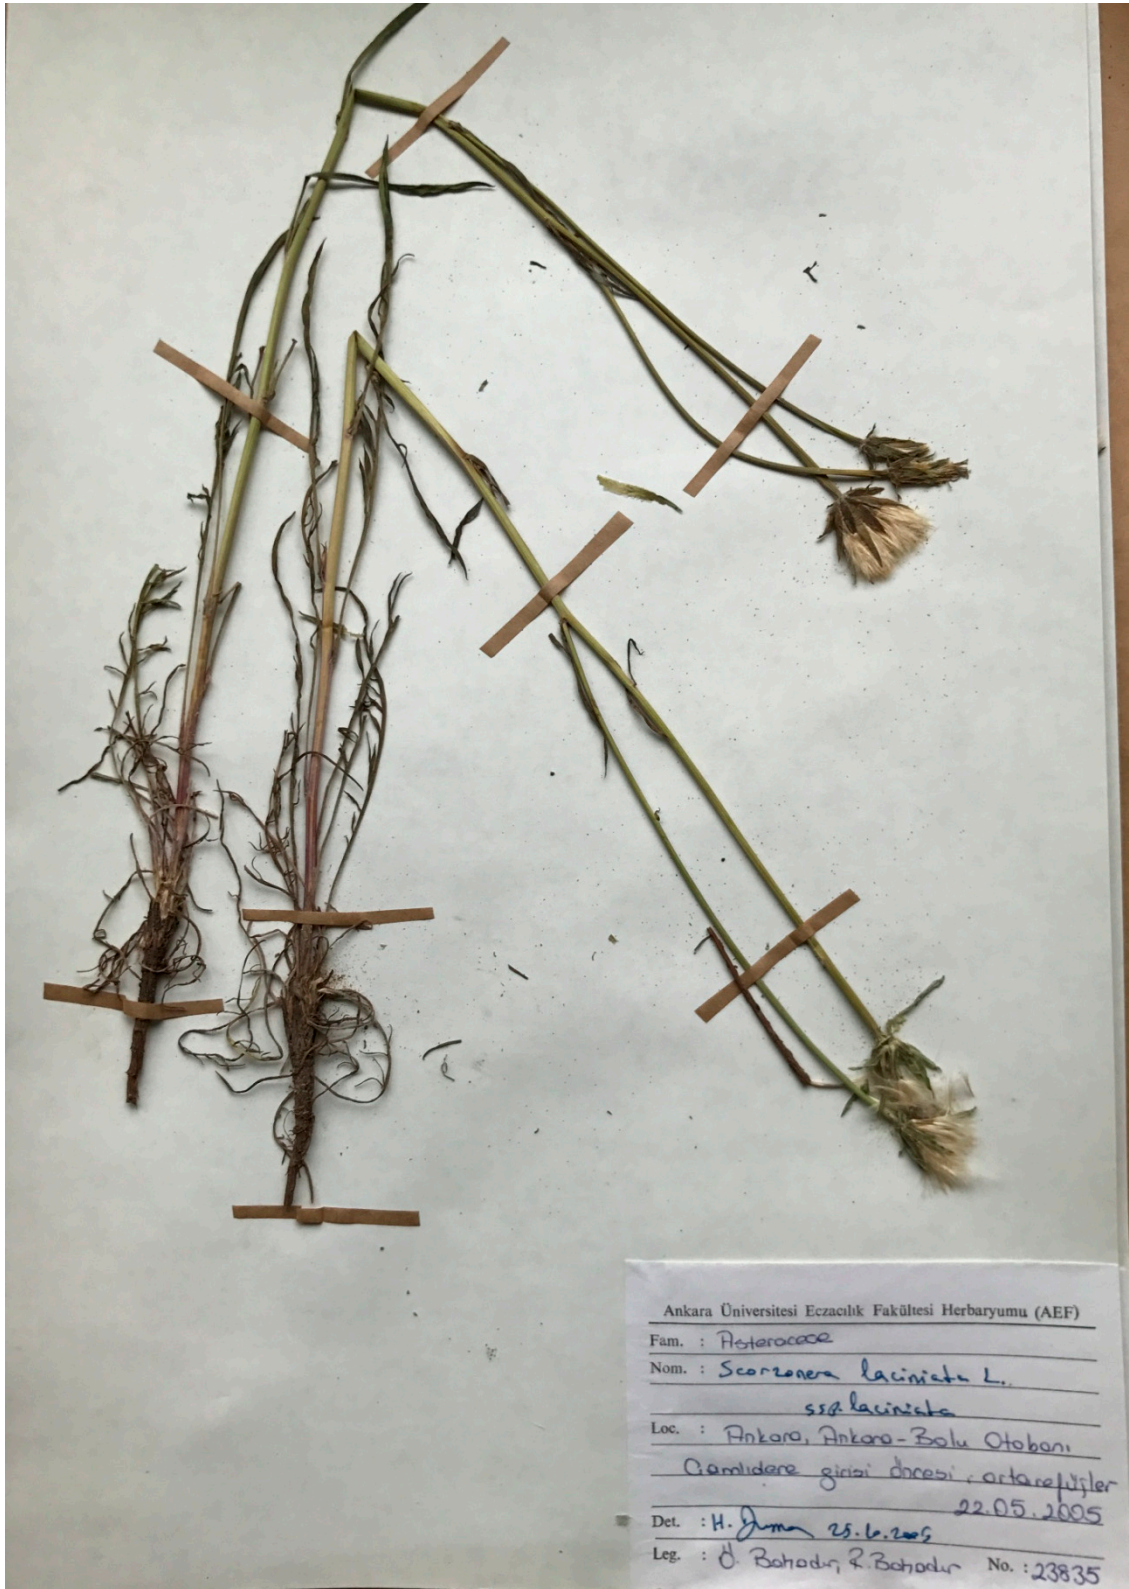

Figure S11: *Scorzonera laciniata* L. ssp. *laciniata*



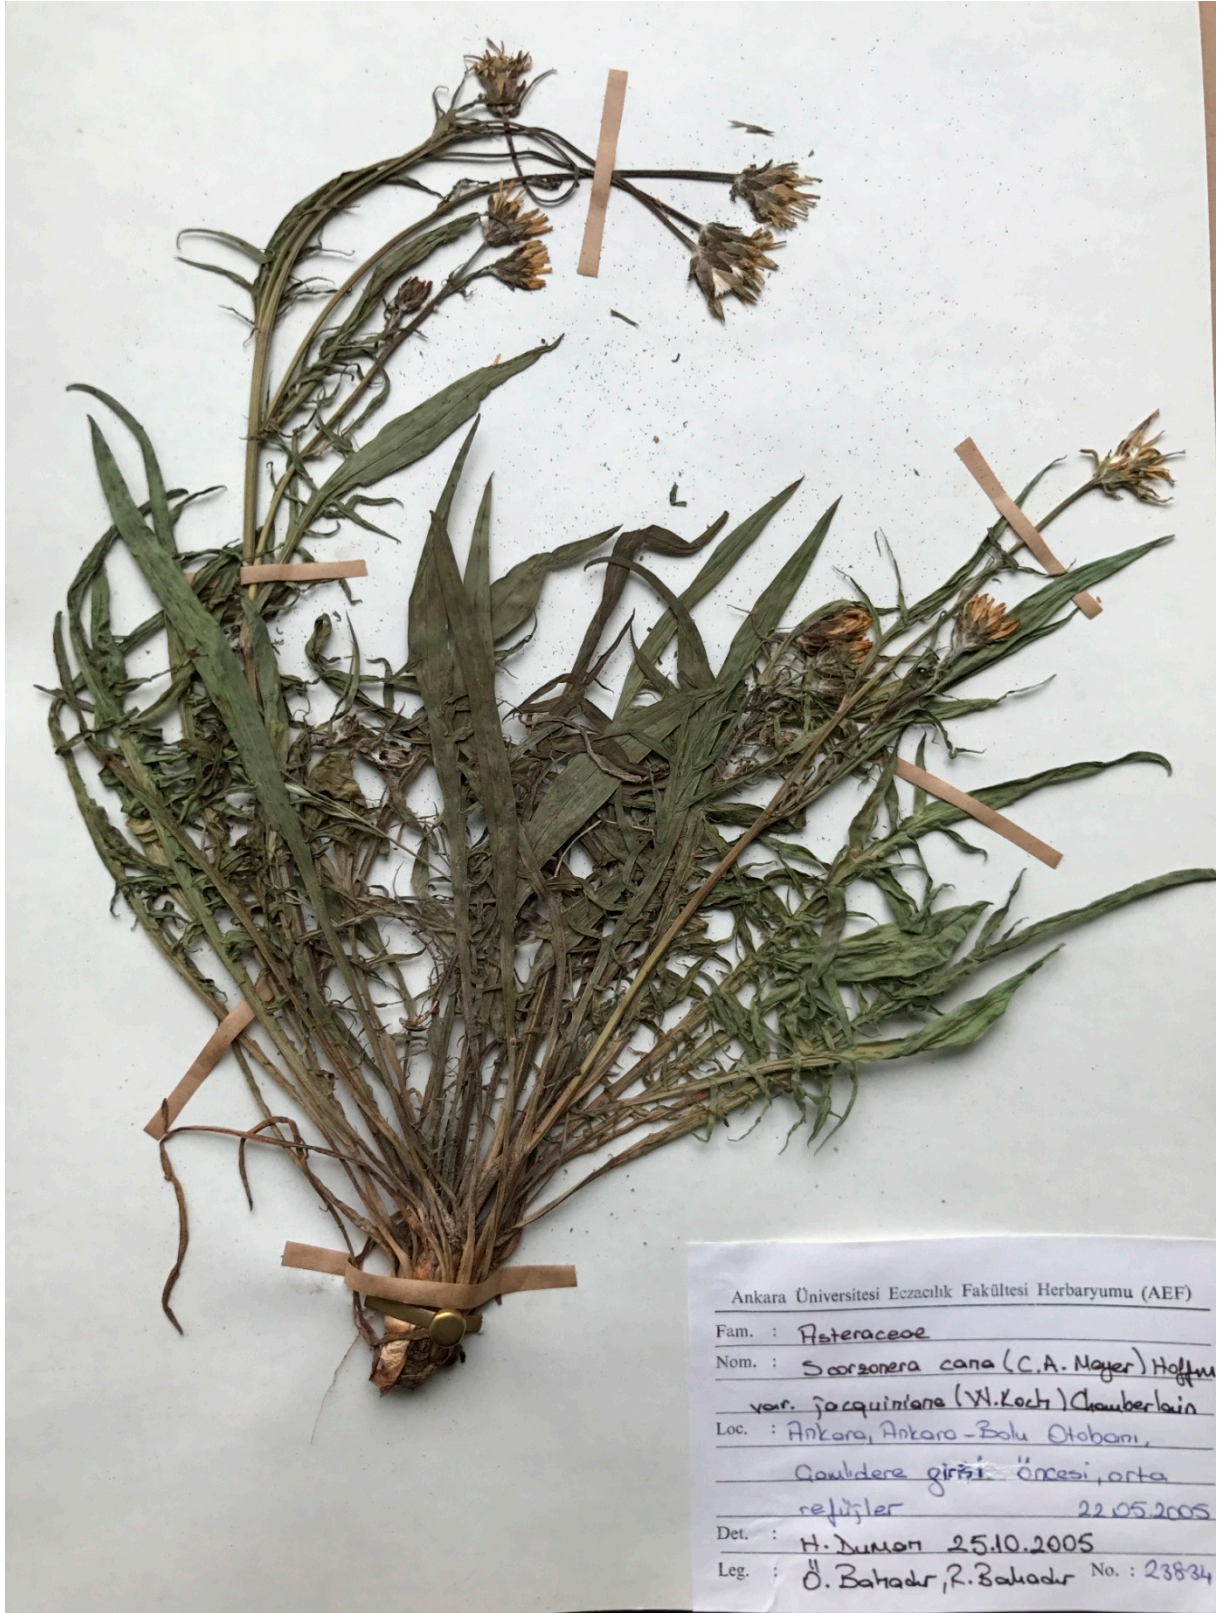

Figure S12: *Scorzonera cana* (C.A. Meyer) Hoffm. var. *jacquiniana* (W. Koch) Chamberlain



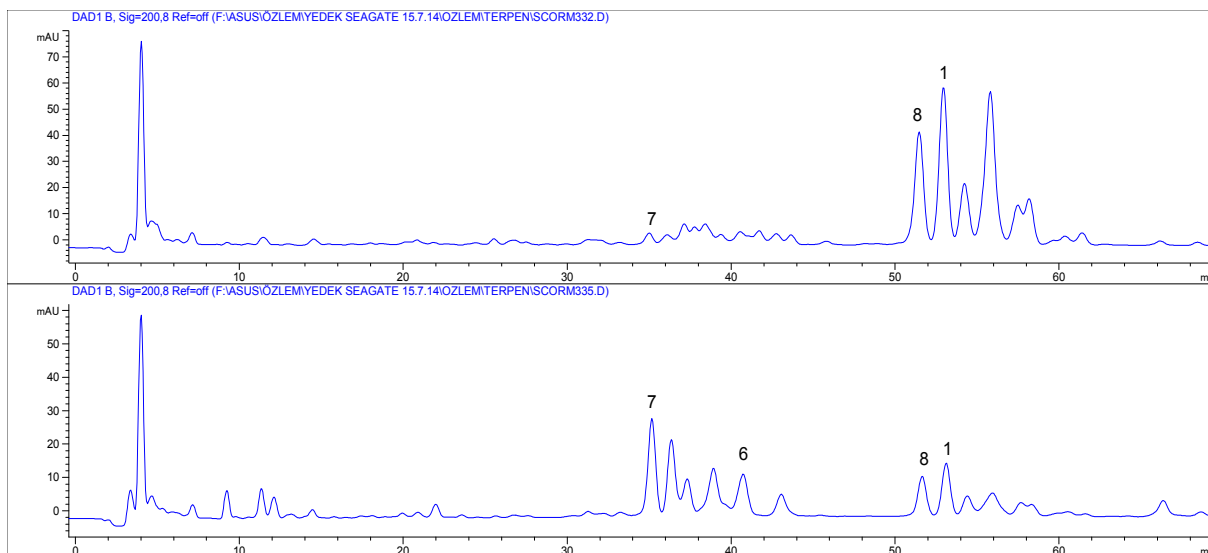

**Figure S13:** HPLC chromatograms of *S. latifolia* root (upper) and aerial (lower) part extract ( $\lambda$  200 nm)

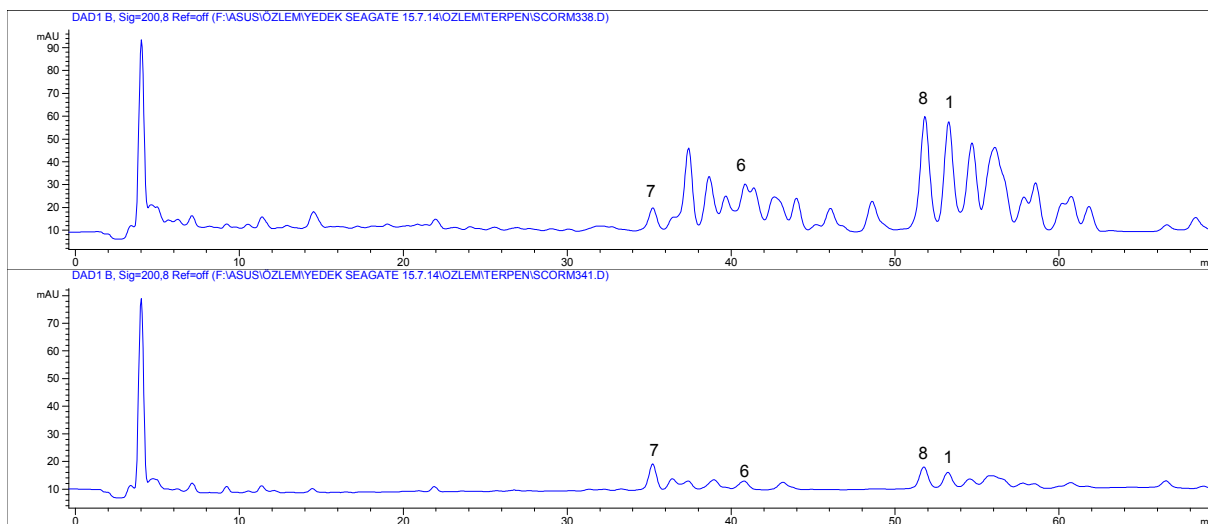

**Figure S14:** HPLC chromatograms of *S. tomentosa* root (upper) and aerial (lower) part extract ( $\lambda$  200 nm)

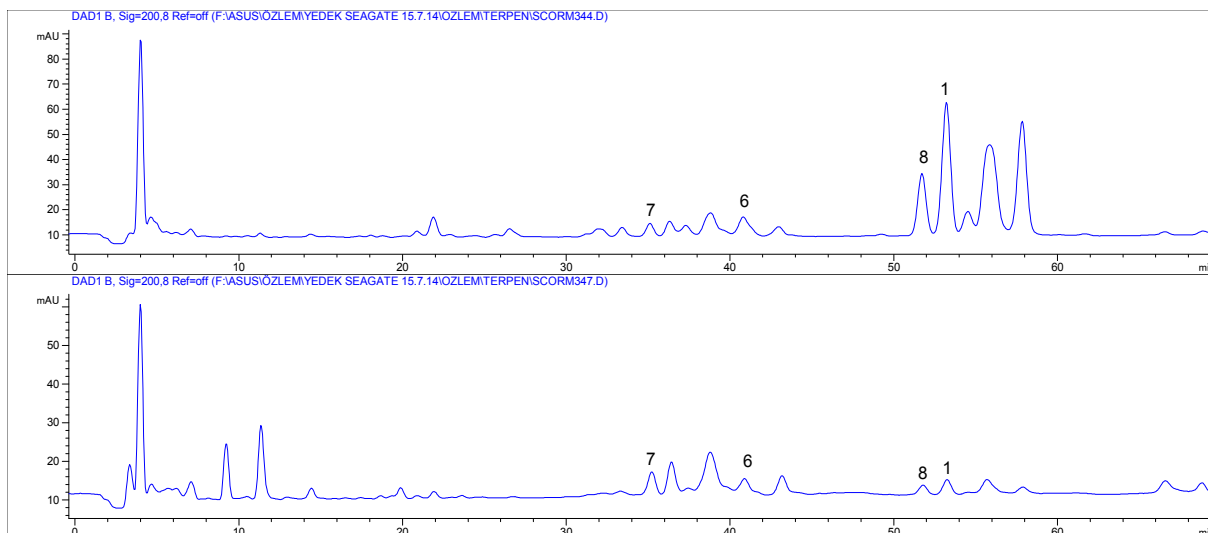

**Figure S15:** HPLC chromatograms of *S. mollis* ssp. *szowitsii* root (upper) and aerial (lower) part extract ( $\lambda$  200 nm)

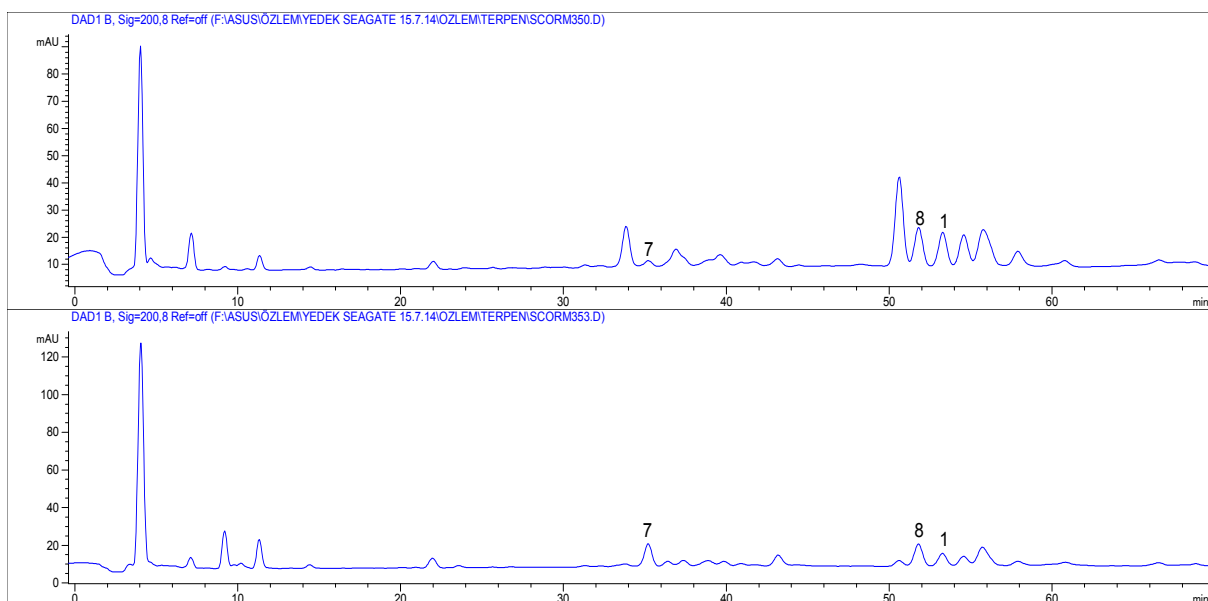

**Figure S16:** HPLC chromatograms of *S. parviflora* root (upper) and aerial (lower) part extract ( $\lambda$  200 nm)



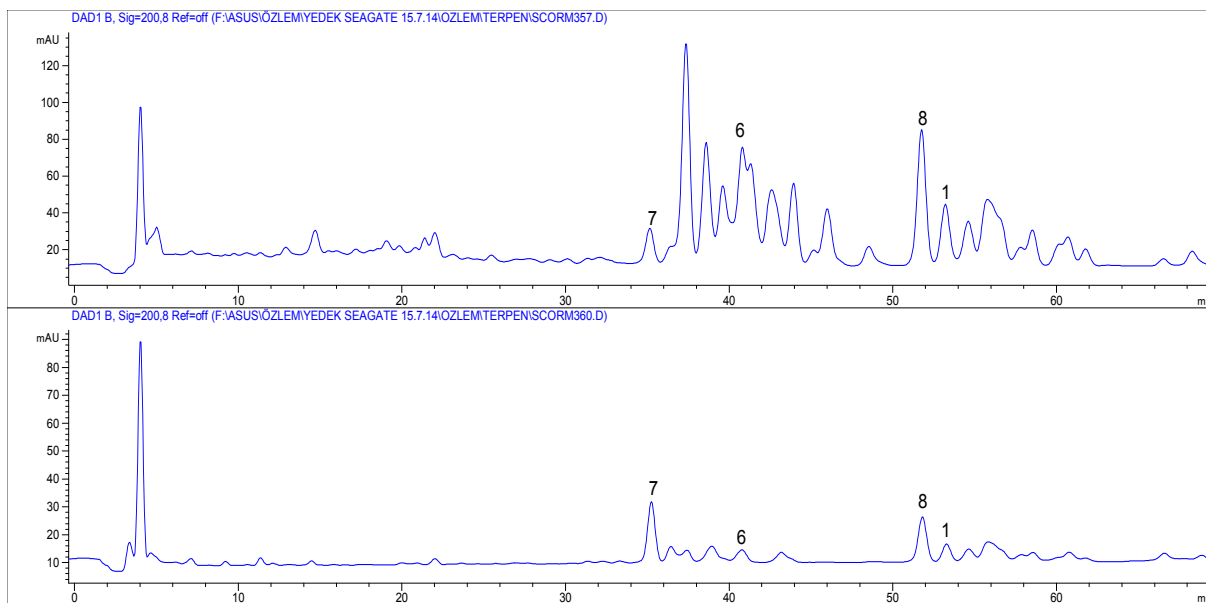

**Figure S17:** HPLC chromatograms of *S. cinerea* root (upper) and aerial (lower) part extract ( $\lambda$  200 nm)

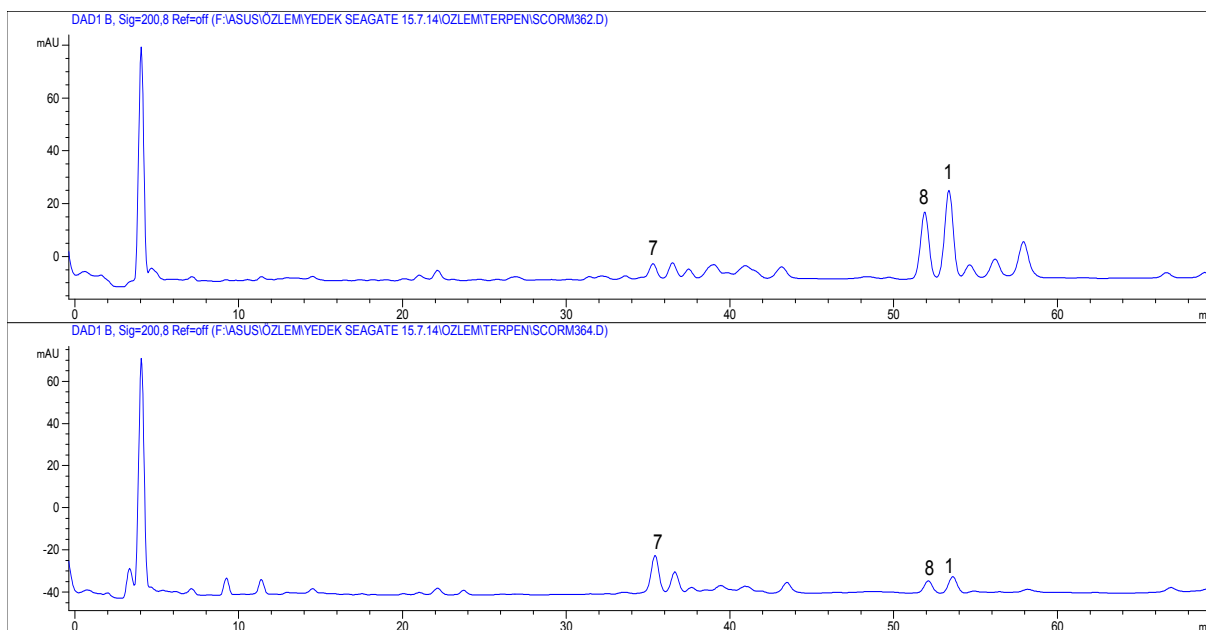

**Figure S18:** HPLC chromatograms of *S. suberosa* ssp. *suberosa* root (upper) and aerial (lower) part extract ( $\lambda$  200 nm)

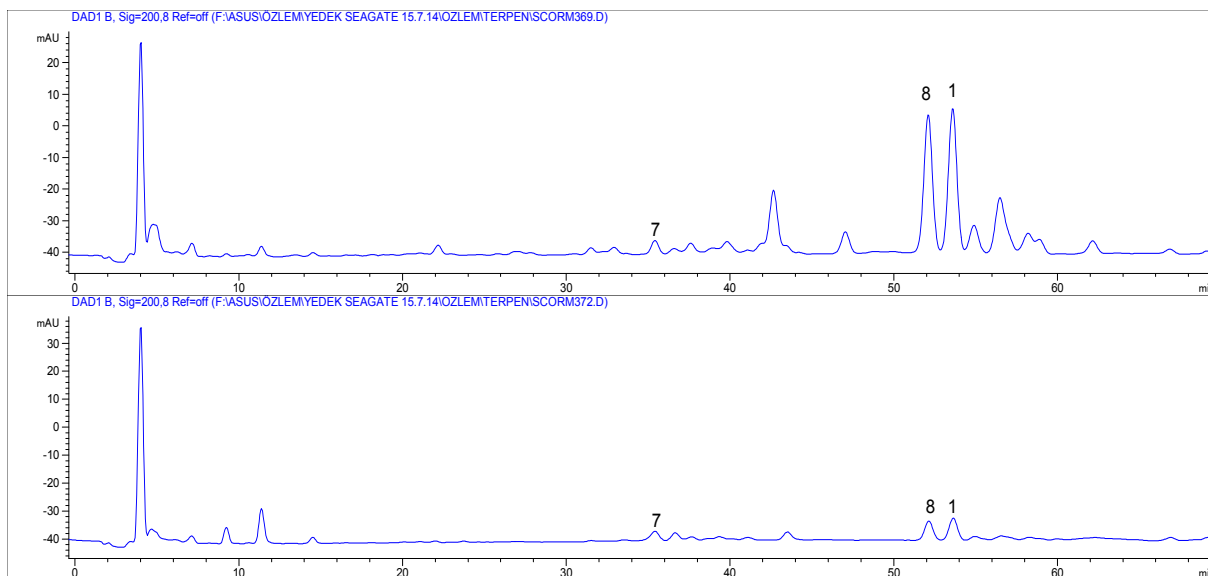

**Figure S19:** HPLC chromatograms of *S. eriophora* root (upper) and aerial (lower) part extract ( $\lambda$  200 nm)

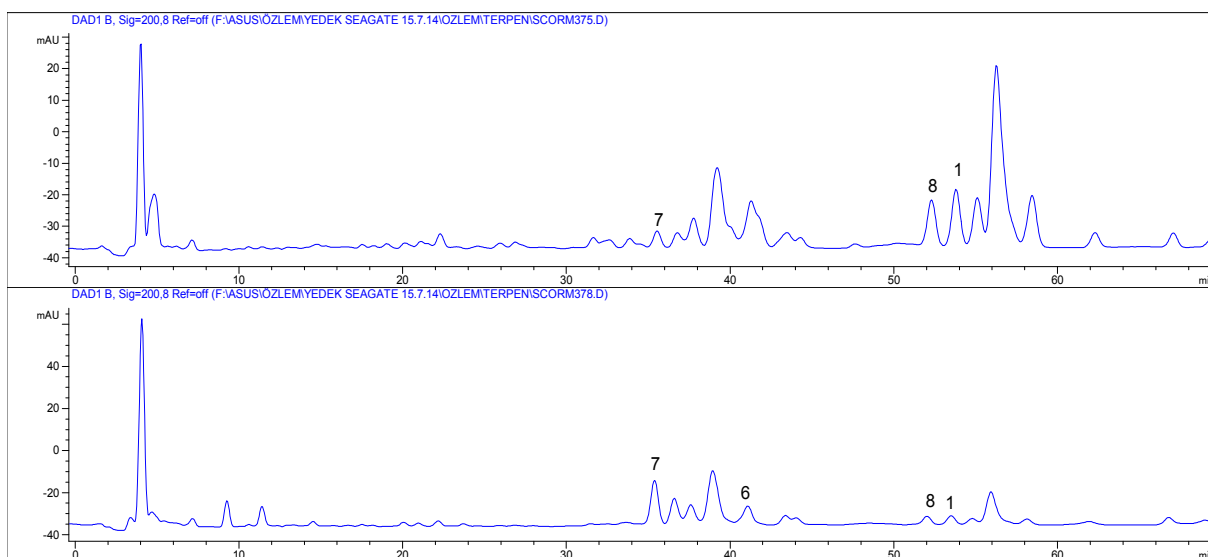

**Figure S20:** HPLC chromatograms of *S. incisa* root (upper) and aerial (lower) part extract ( $\lambda$  200 nm)



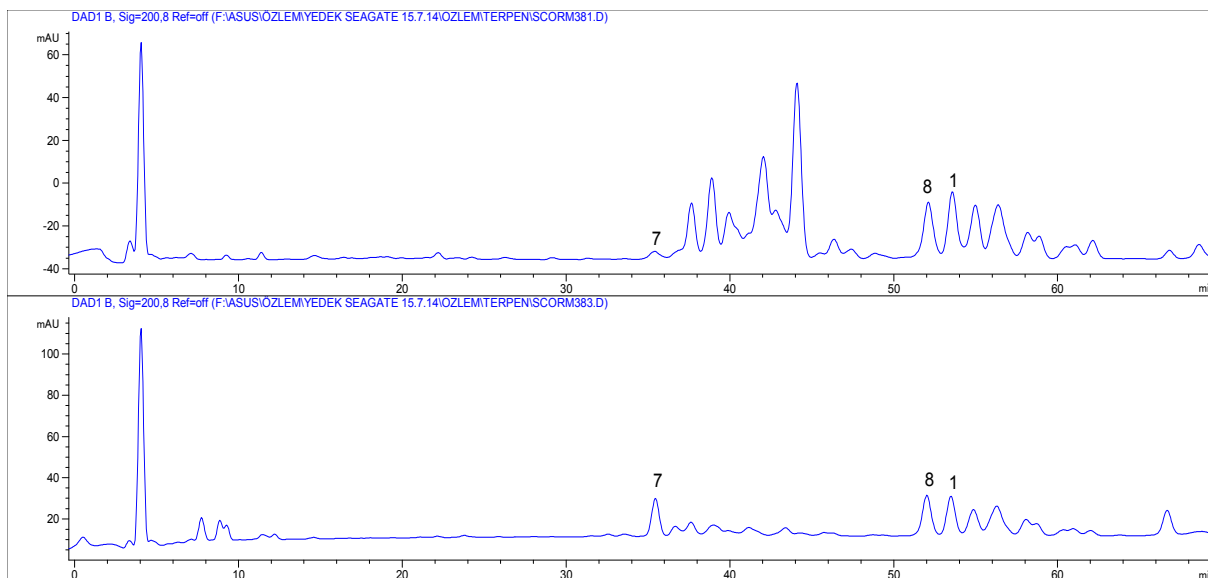

**Figure S21:** HPLC chromatograms of *S. mirabilis* root (upper) and aerial (lower) part extract ( $\lambda$  200 nm)

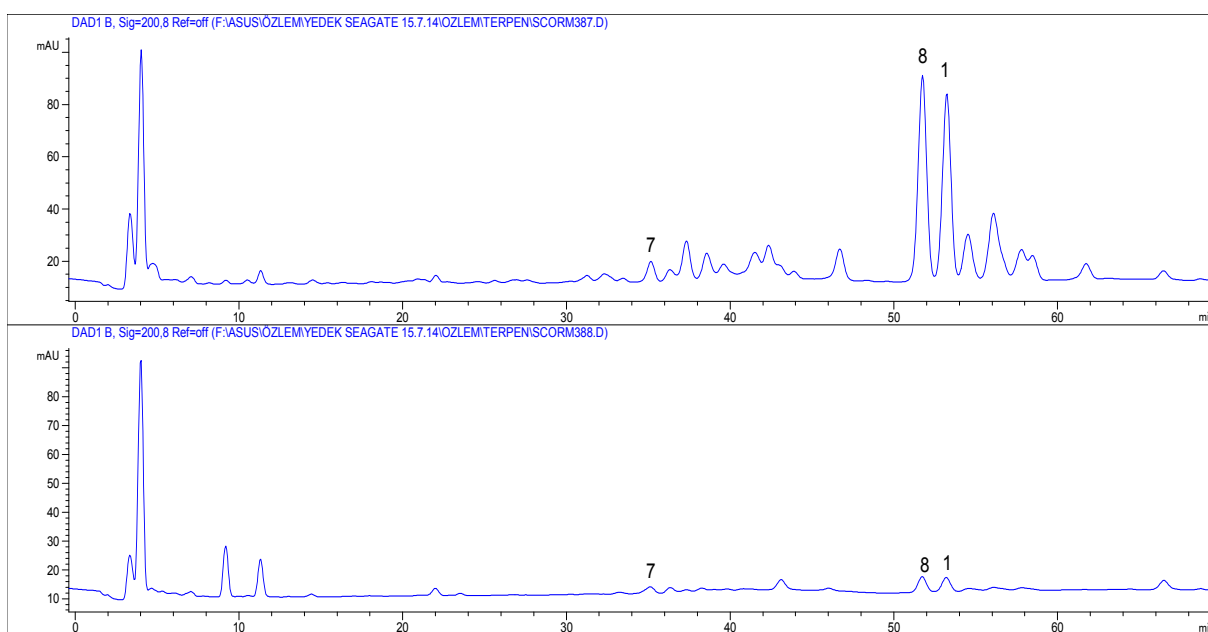

**Figure S22:** HPLC chromatograms of *S. sublanata* root (upper) and aerial (lower) part extract ( $\lambda$  200 nm)

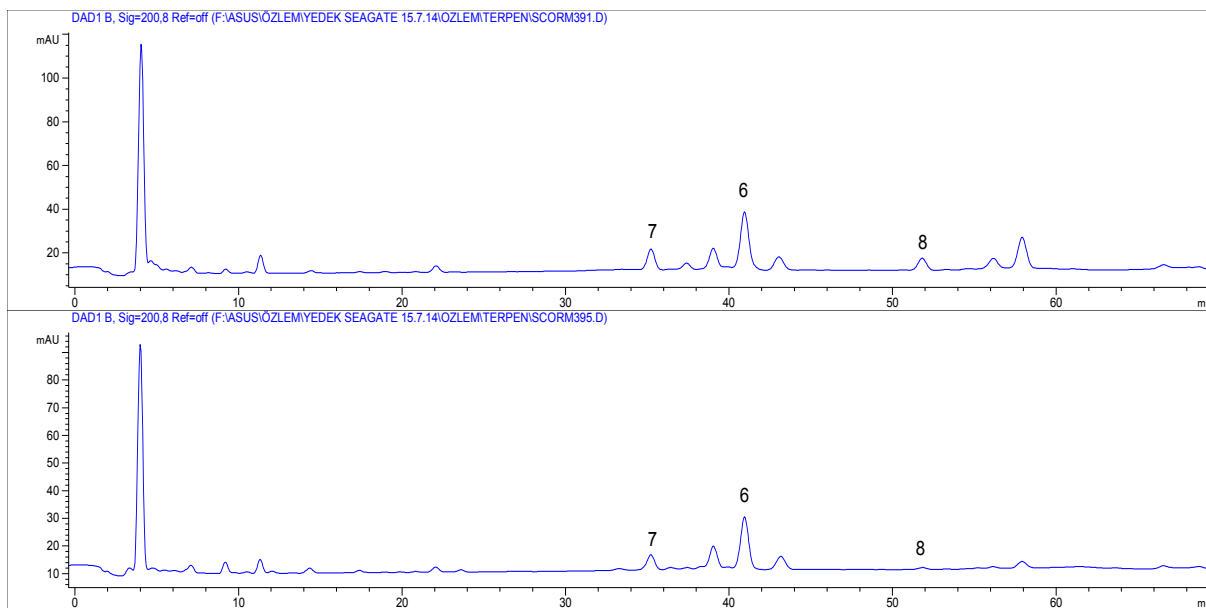

**Figure S23:** HPLC chromatograms of *S. acuminata* root (upper) and aerial (lower) part extract ( $\lambda$  200 nm)

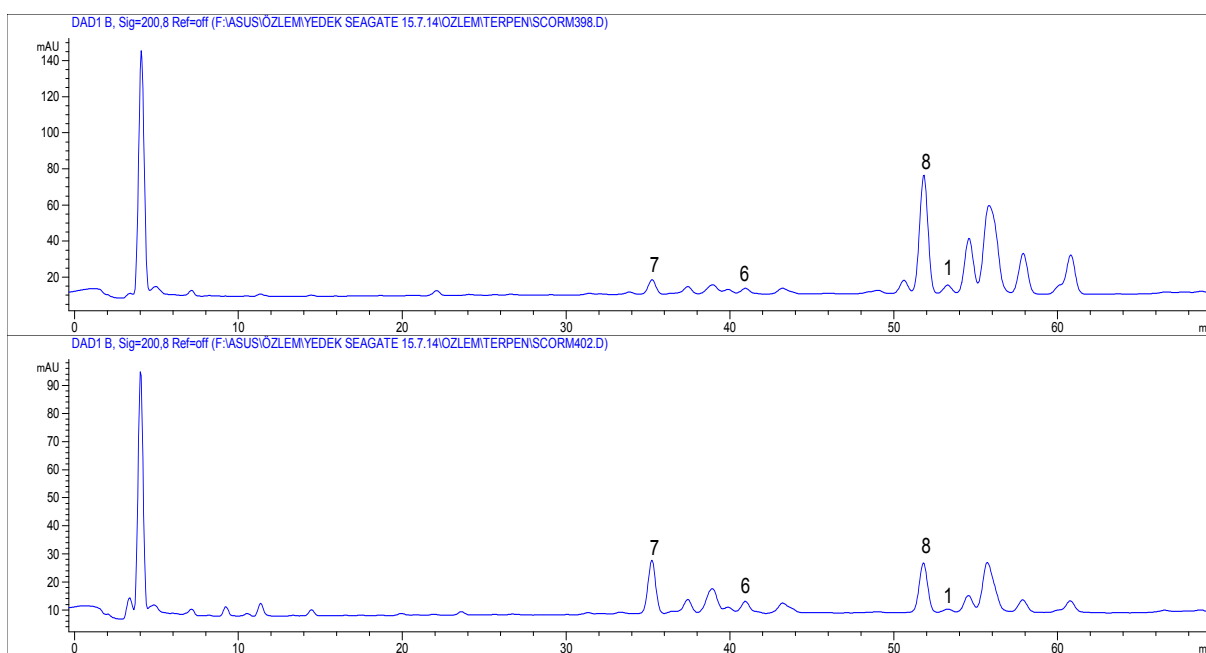

**Figure S24:** HPLC chromatograms of *S. laciniata* ssp. *laciniata* root (upper) and aerial (lower) part extract ( $\lambda$  200 nm)

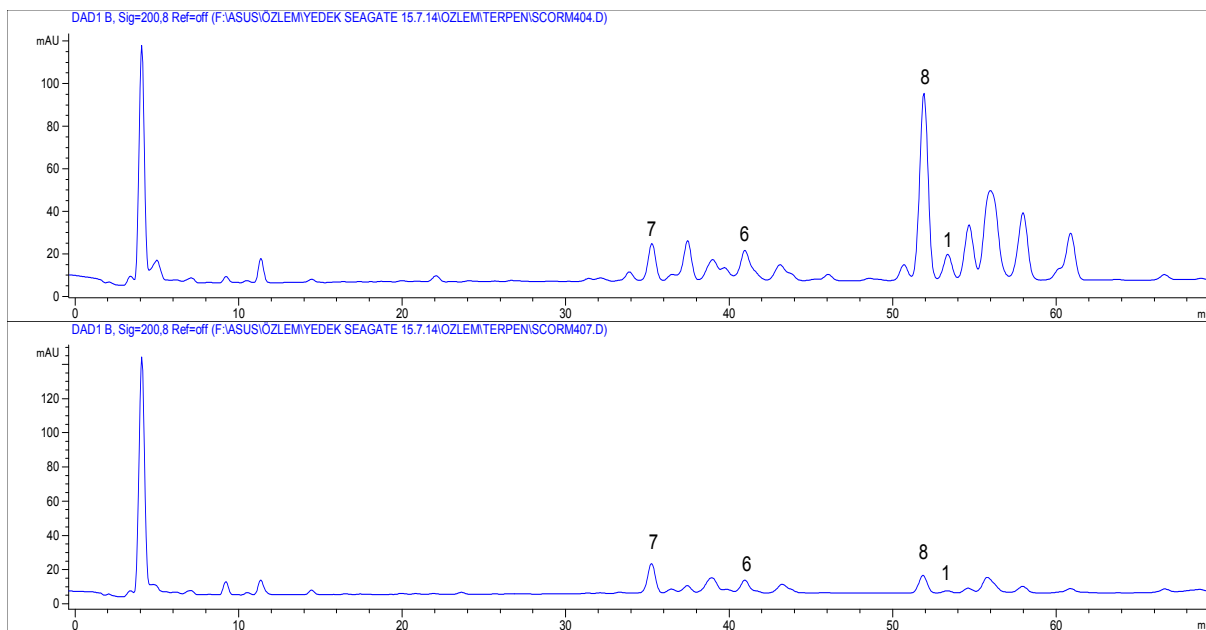

**Figure S25:** HPLC chromatograms of *S. cana* var. *jacquiniana* root (upper) and aerial (lower) part extract ( $\lambda$  200 nm)



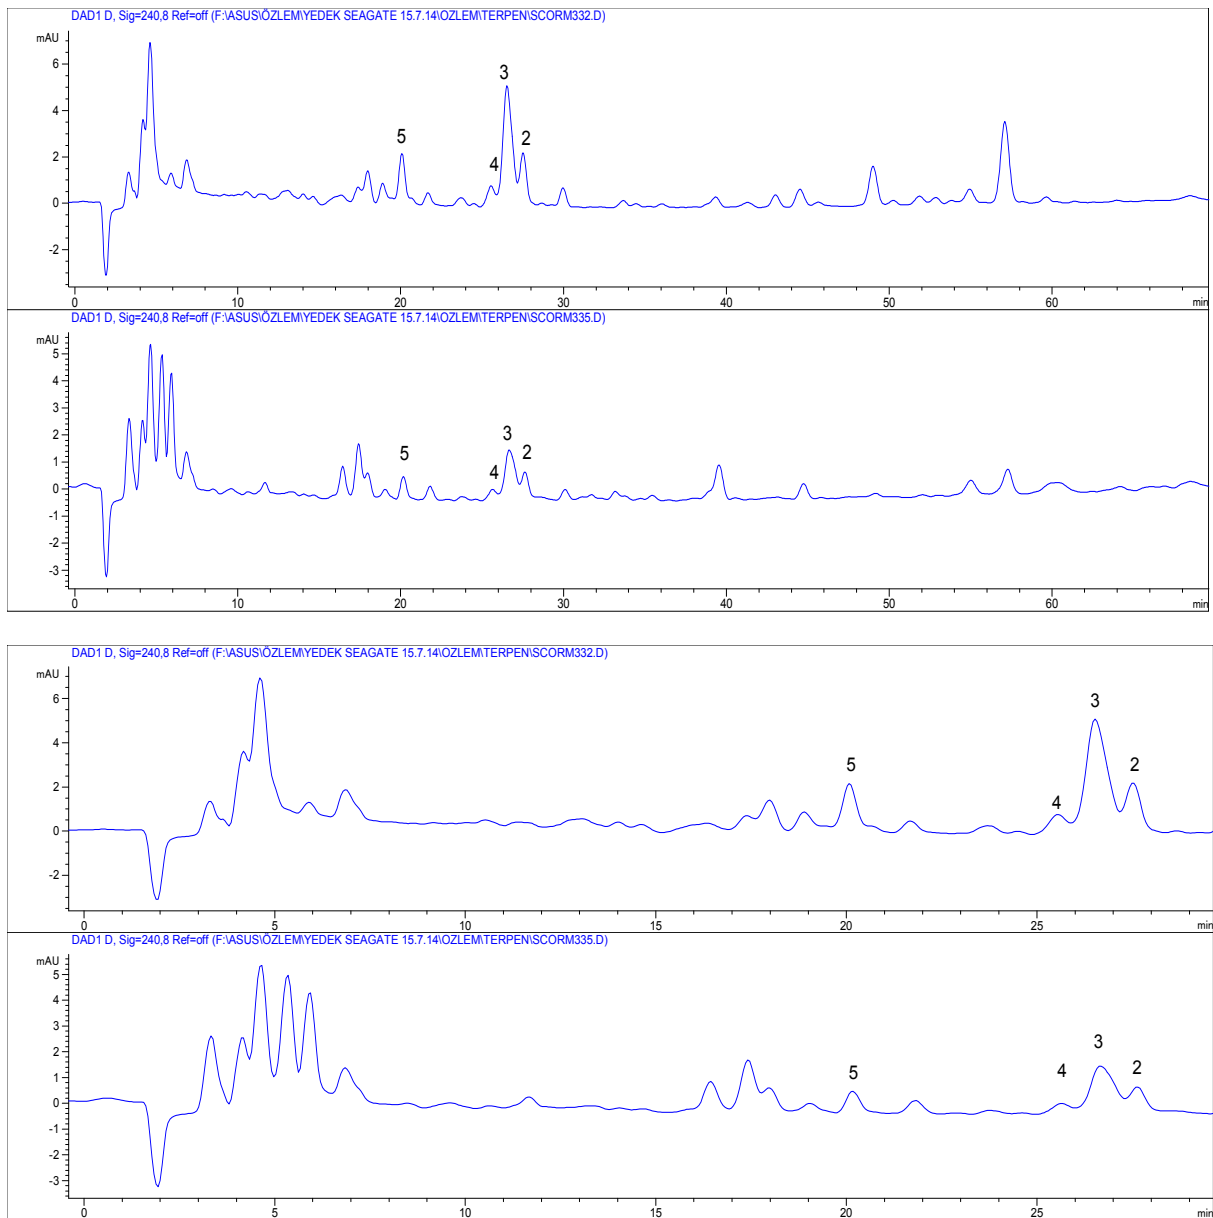

**Figure S26:** HPLC chromatograms of *S. latifolia* root (upper) and aerial (lower) part extract ( $\lambda$  200 and 240 nm)

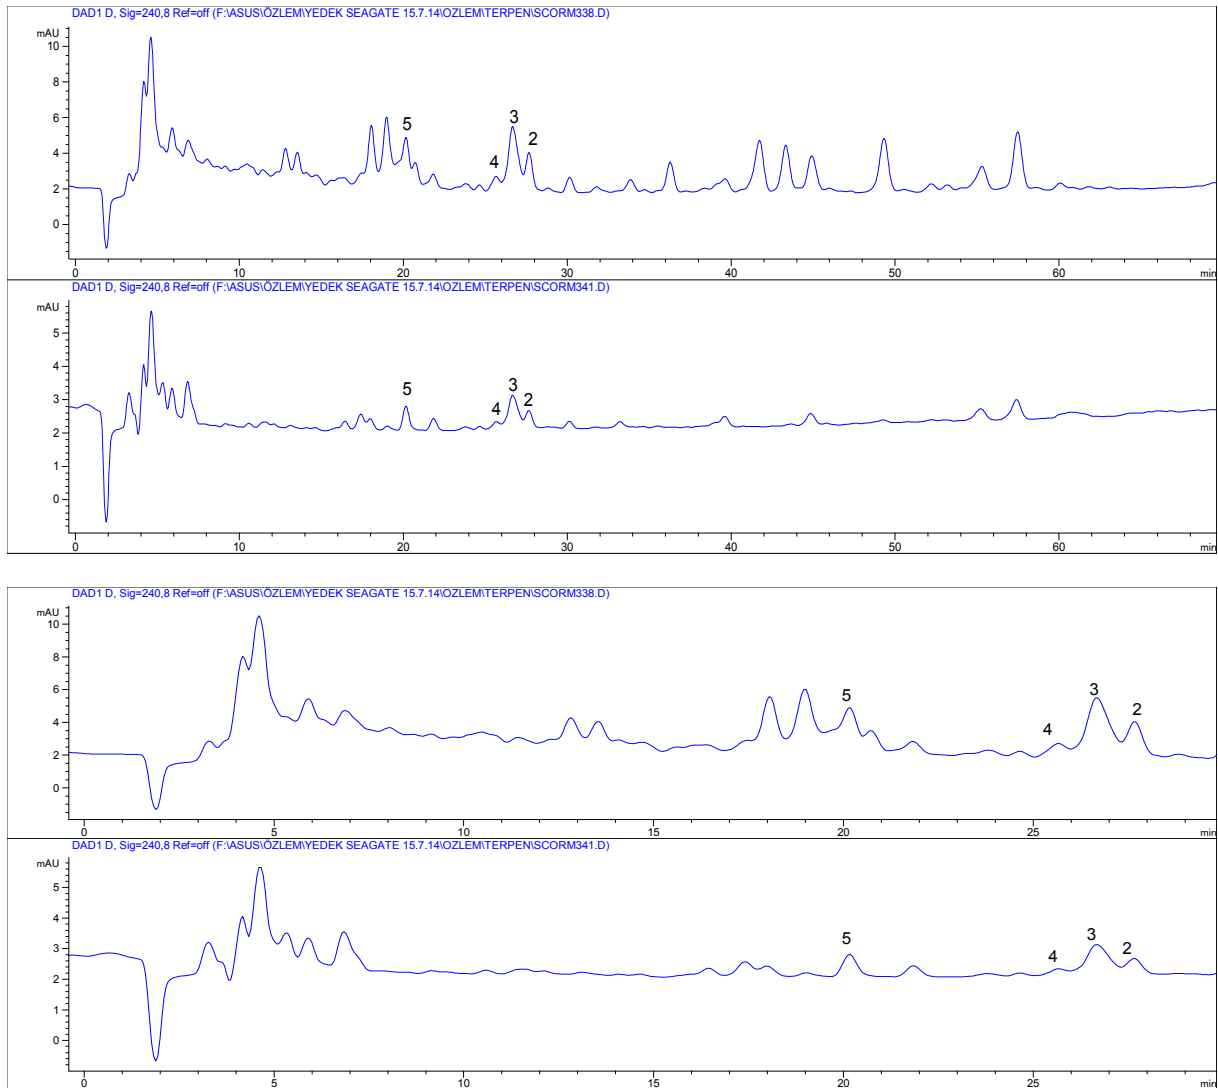

**Figure S27:** HPLC chromatograms of *S. tomentosa* root (upper) and aerial (lower) part extract ( $\lambda$  200 and 240 nm)



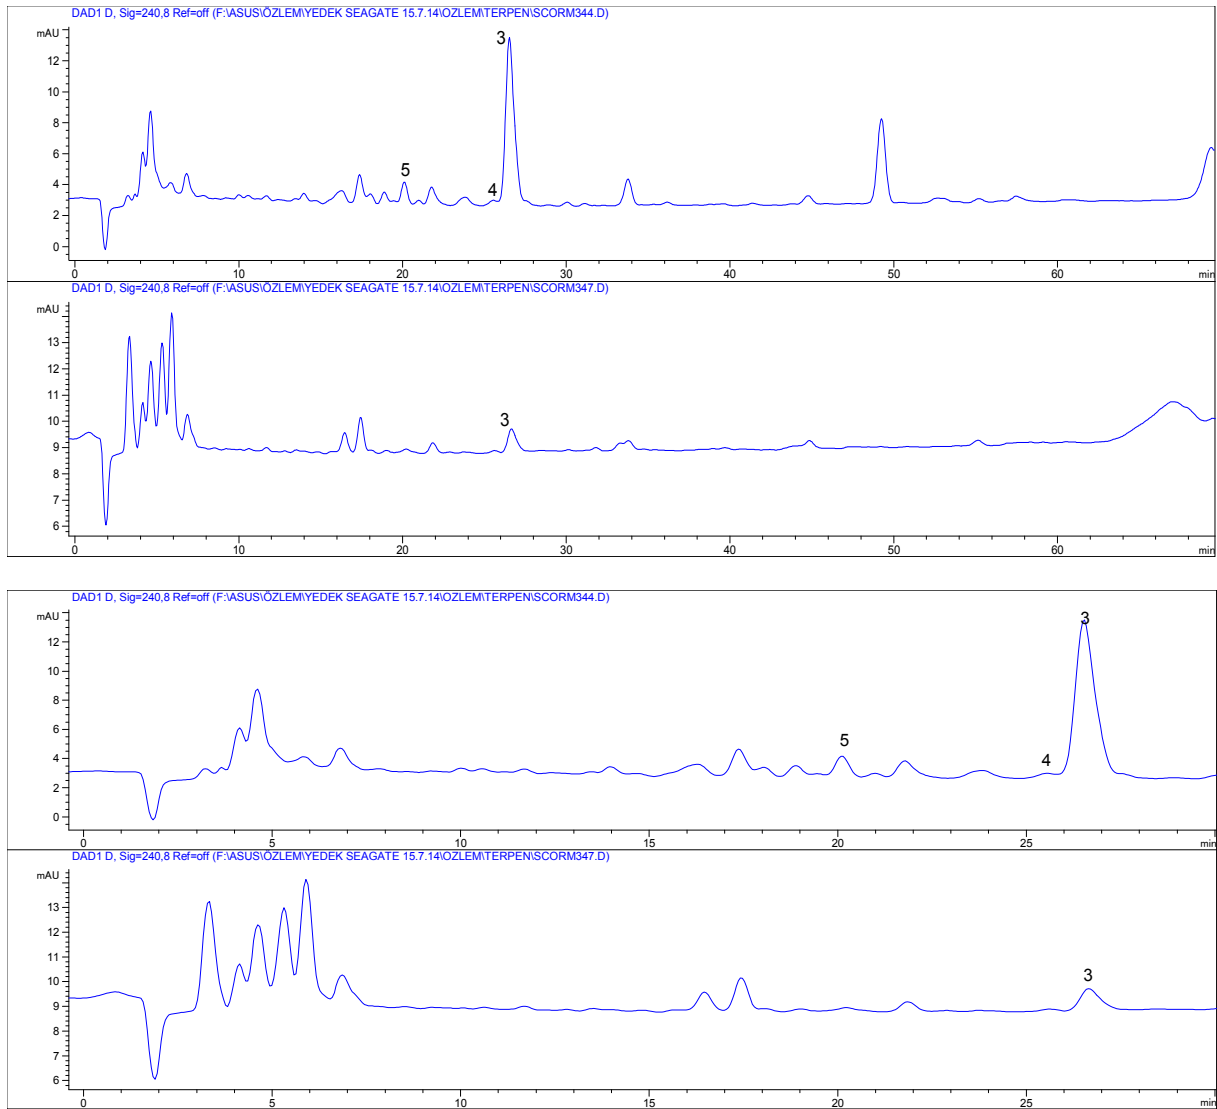

**Figure S28:** HPLC chromatograms of *S. mollis* ssp. *szowitsii* root (upper) and aerial (lower) part extract ( $\lambda$  200 and 240 nm)

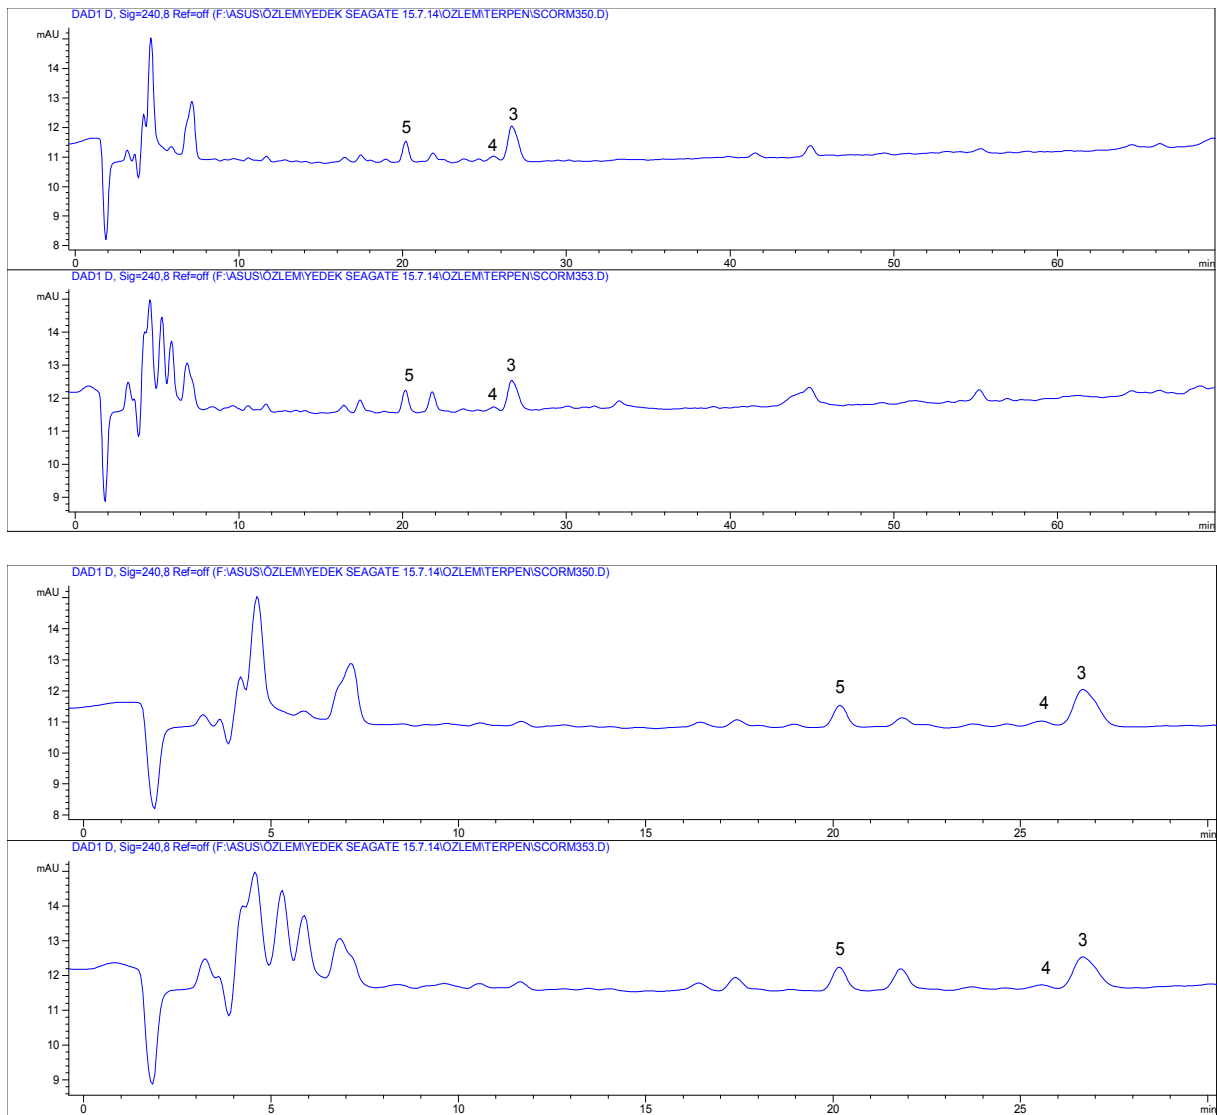

**Figure S29:** HPLC chromatograms of *S. parviflora* root (upper) and aerial (lower) part extract ( $\lambda$  200 and 240 nm)



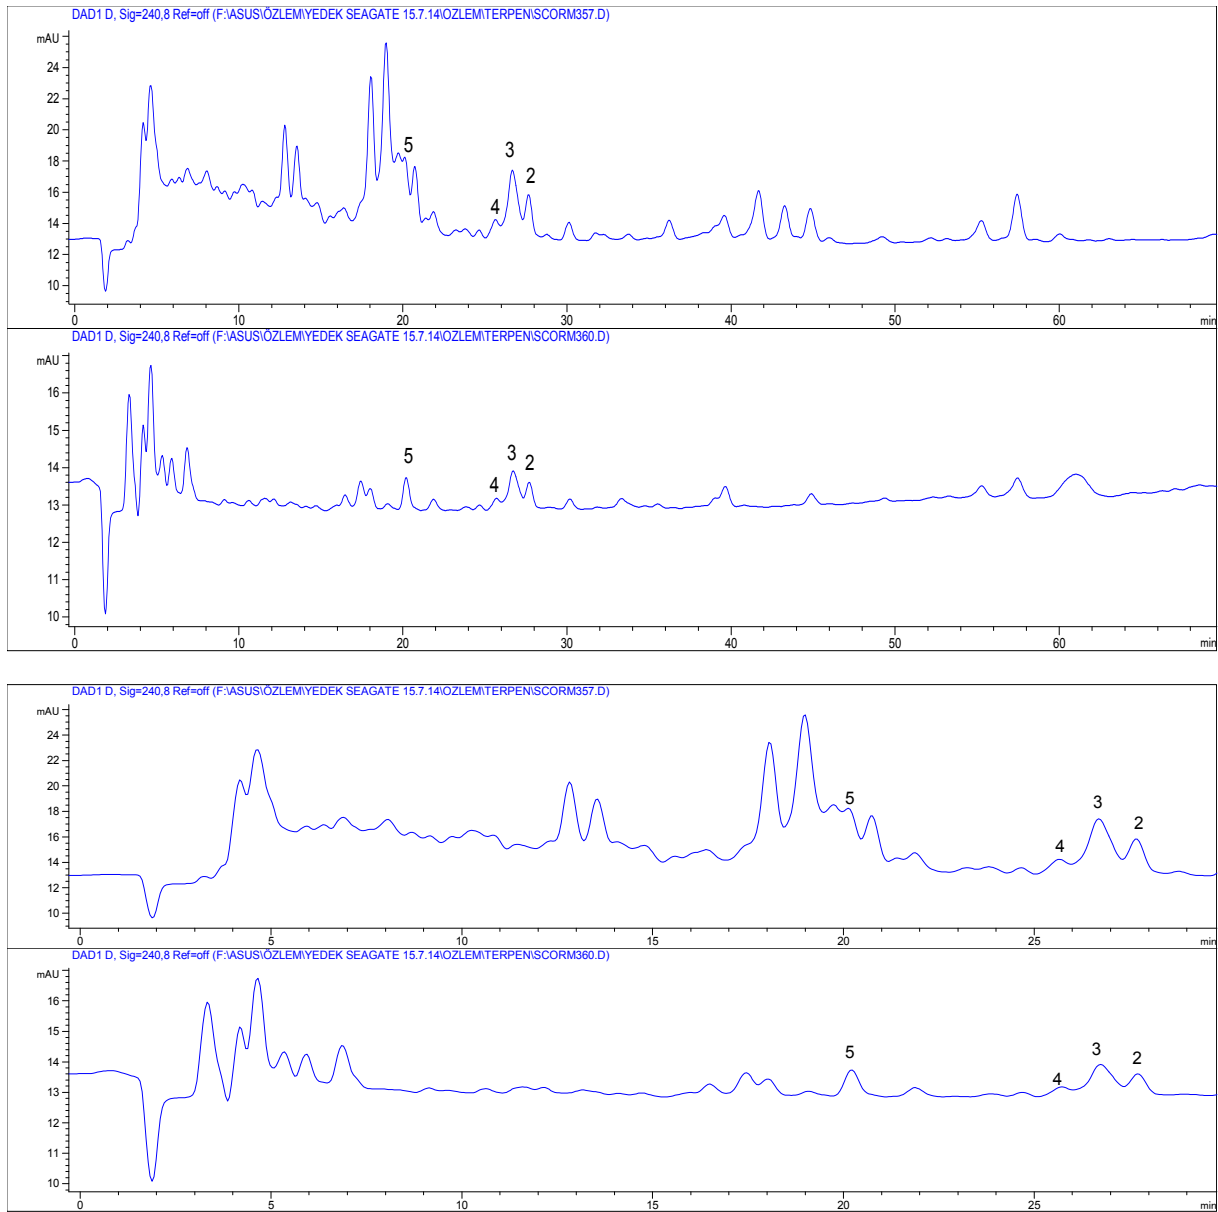

**Figure S30:** HPLC chromatograms of *S. cinerea* root (upper) and aerial (lower) part extract ( $\lambda$  200 and 240 nm)

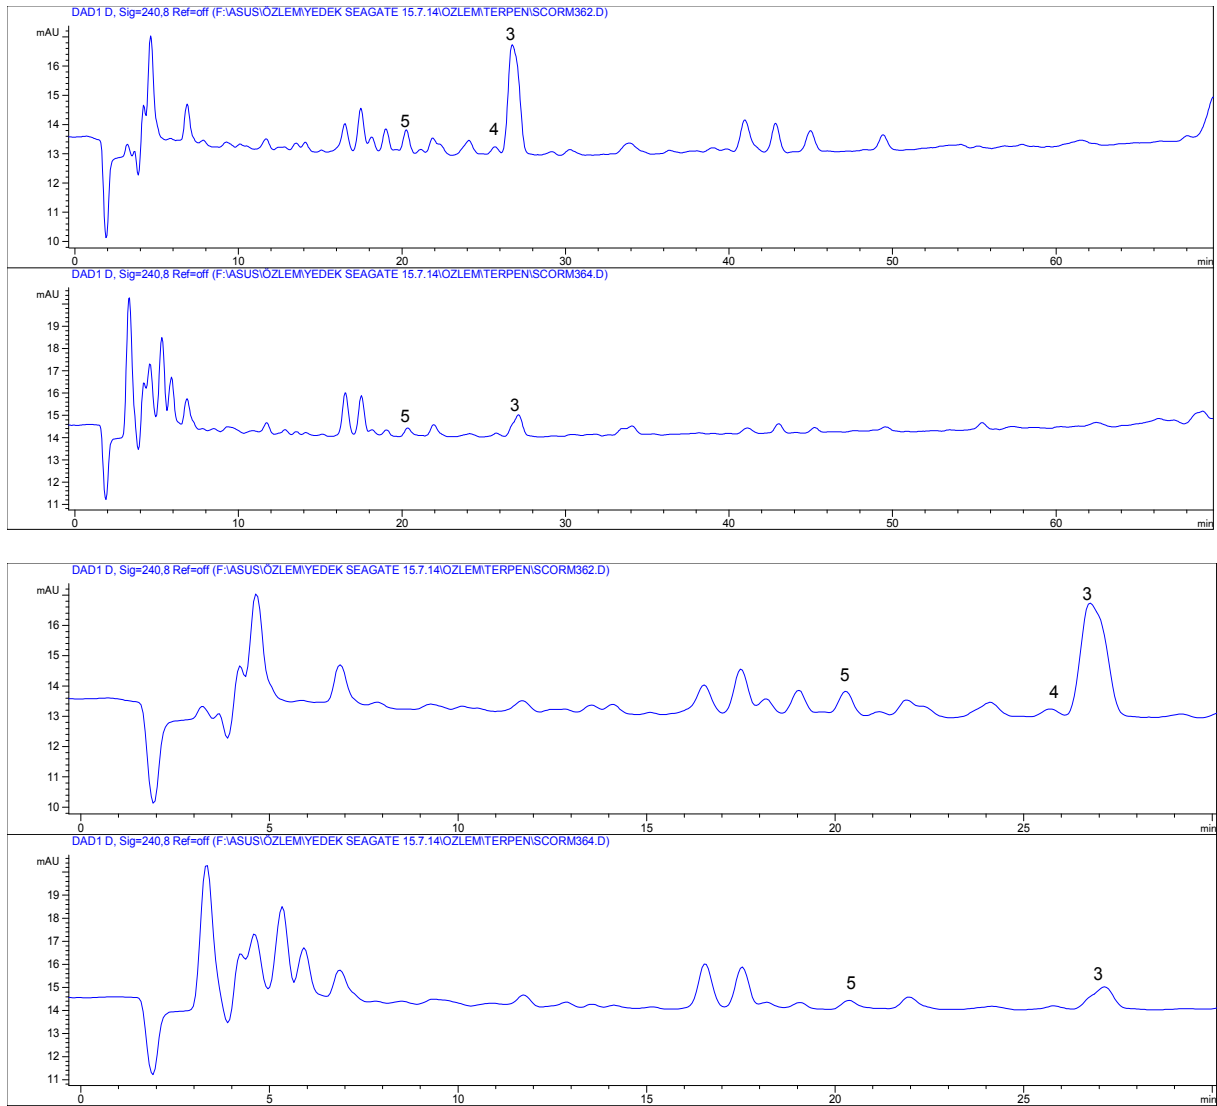

**Figure S31:** HPLC chromatograms of *S. suberosa* ssp. *suberosa* (upper) and aerial (lower) part extract ( $\lambda$  200 and 240 nm)



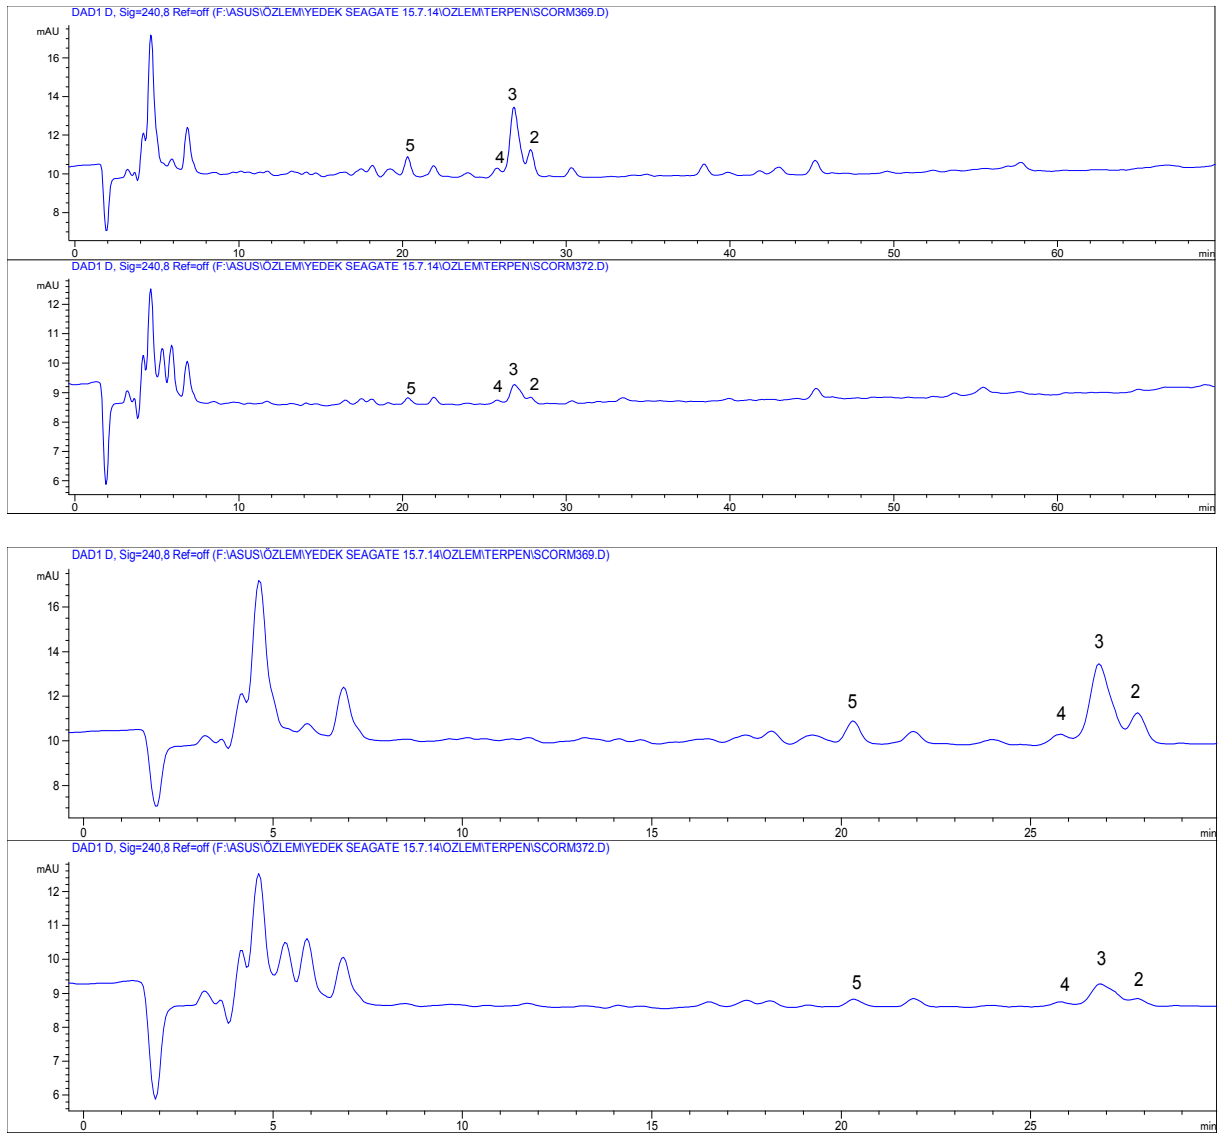

**Figure S32:** HPLC chromatograms of *S. eriophora* root (upper) and aerial (lower) part extract ( $\lambda$  200 and 240 nm)

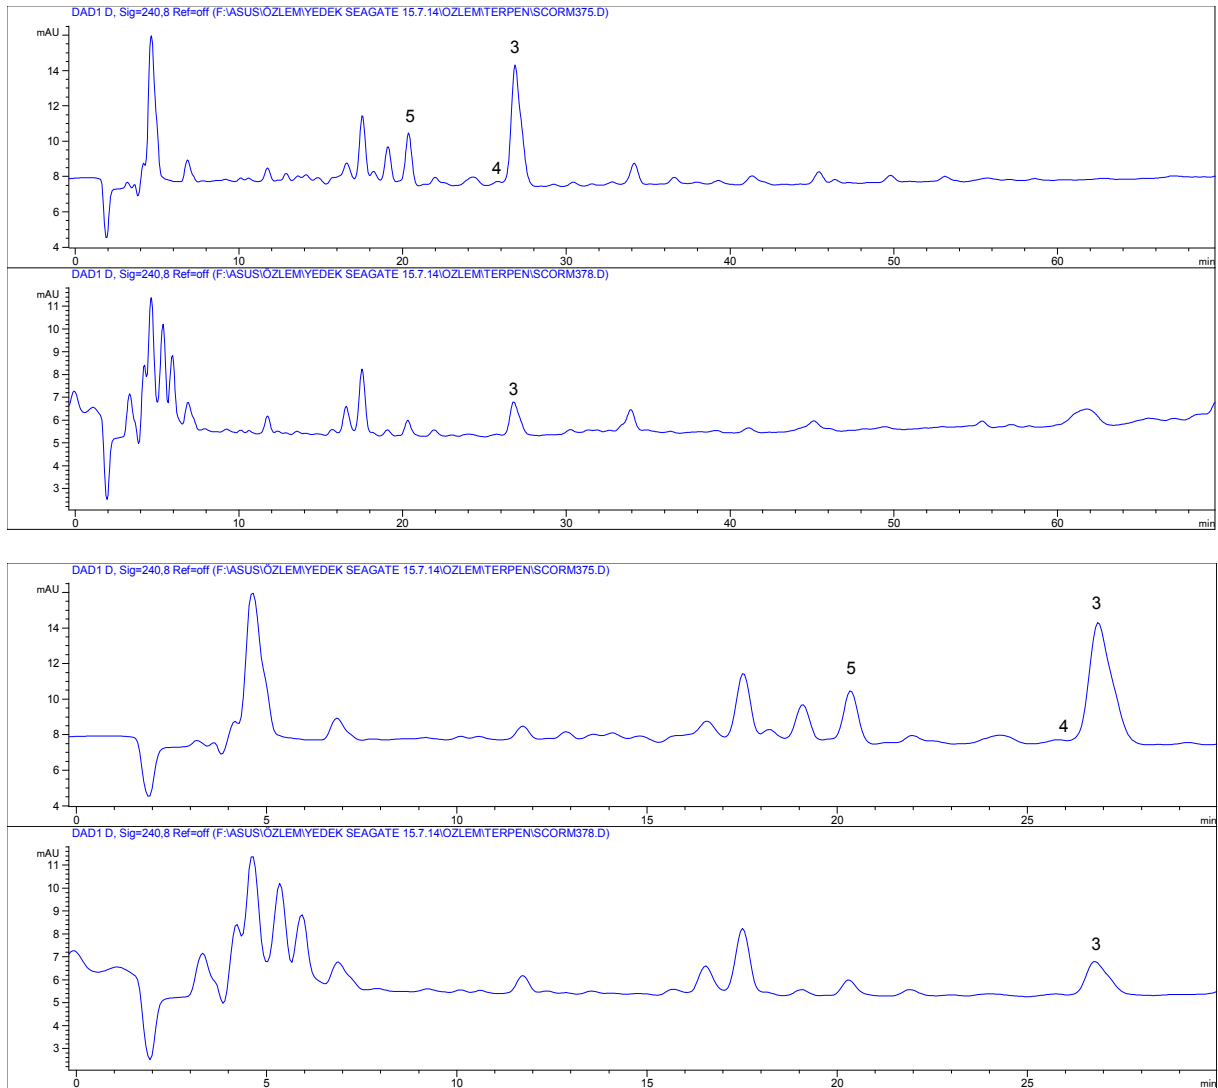

**Figure S33:** HPLC chromatograms of *S. incisa* root (upper) and aerial (lower) part extract ( $\lambda$  200 and 240 nm)

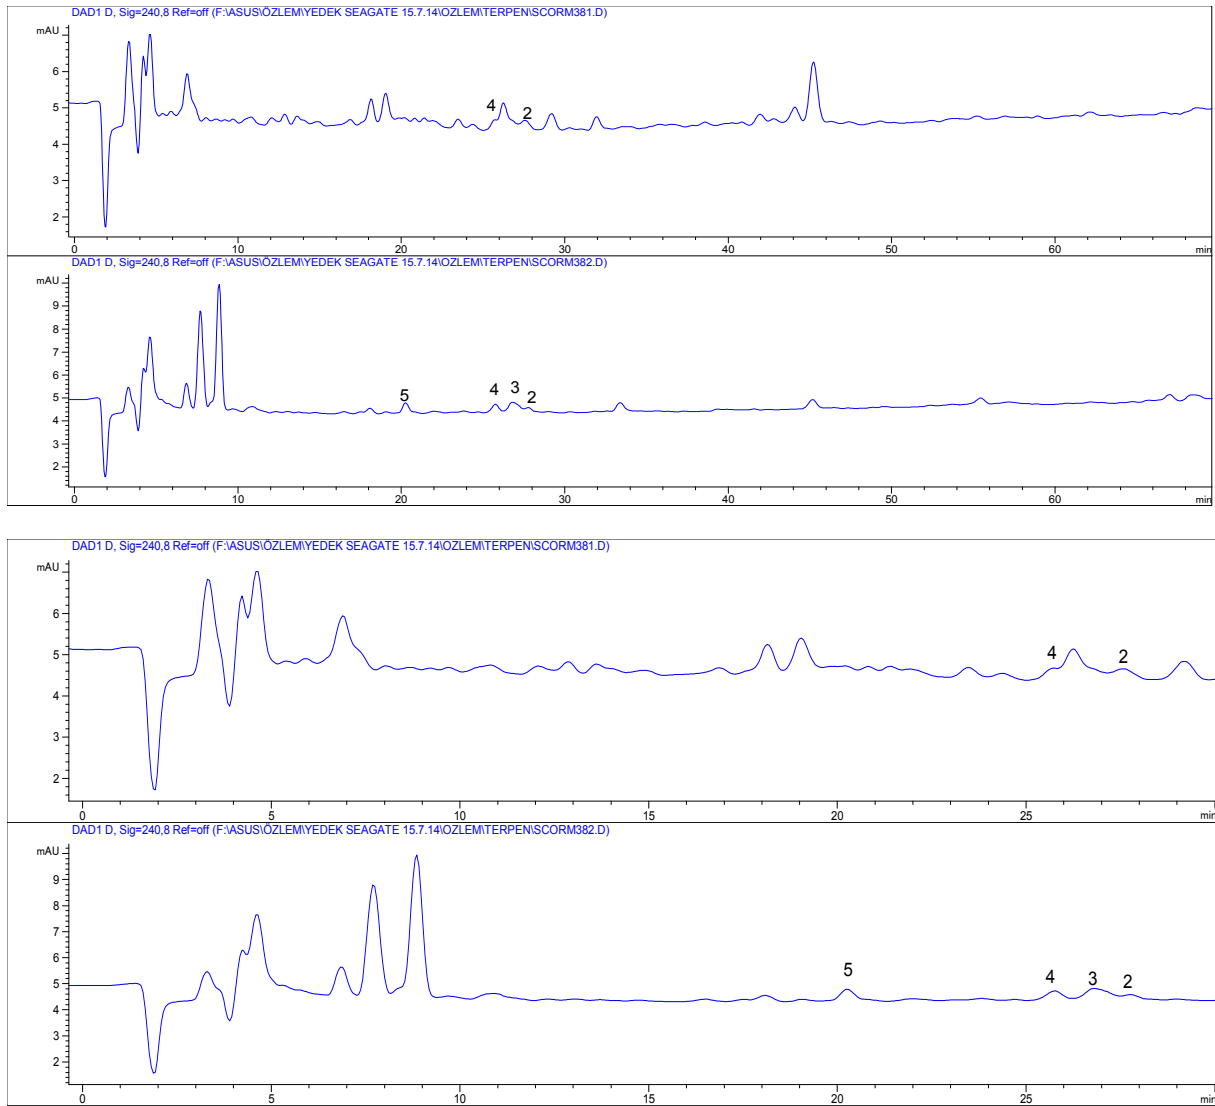

**Figure S34:** HPLC chromatograms of *S. mirabilis* root (upper) and aerial (lower) part extract ( $\lambda$  200 and 240 nm)



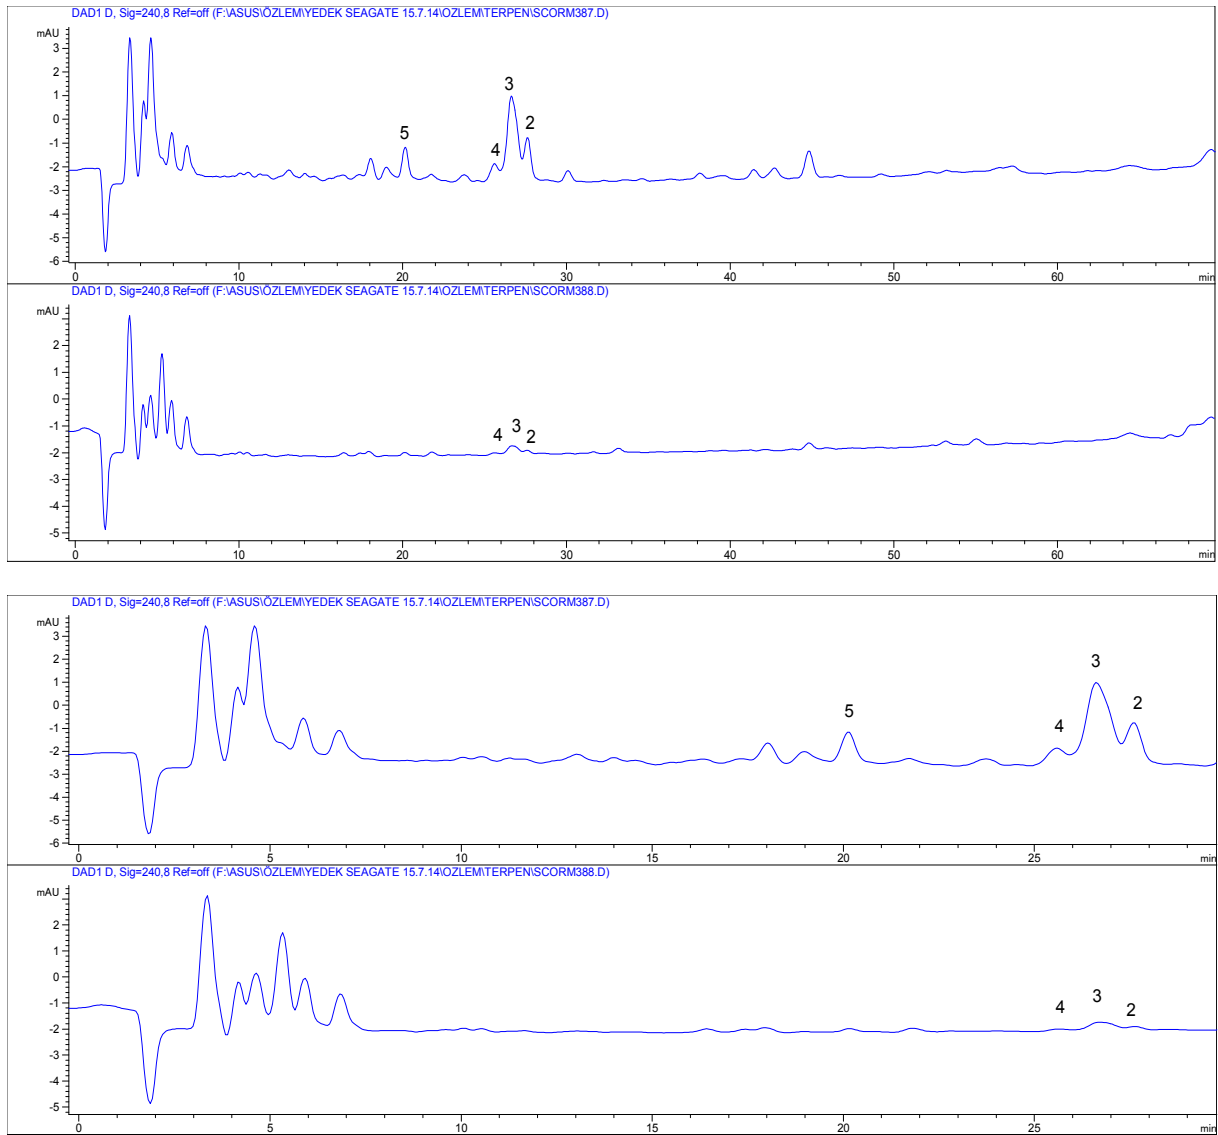

**Figure S35:** HPLC chromatograms of *S. sublanata* root (upper) and aerial (lower) part extract ( $\lambda$  200 and 240 nm)

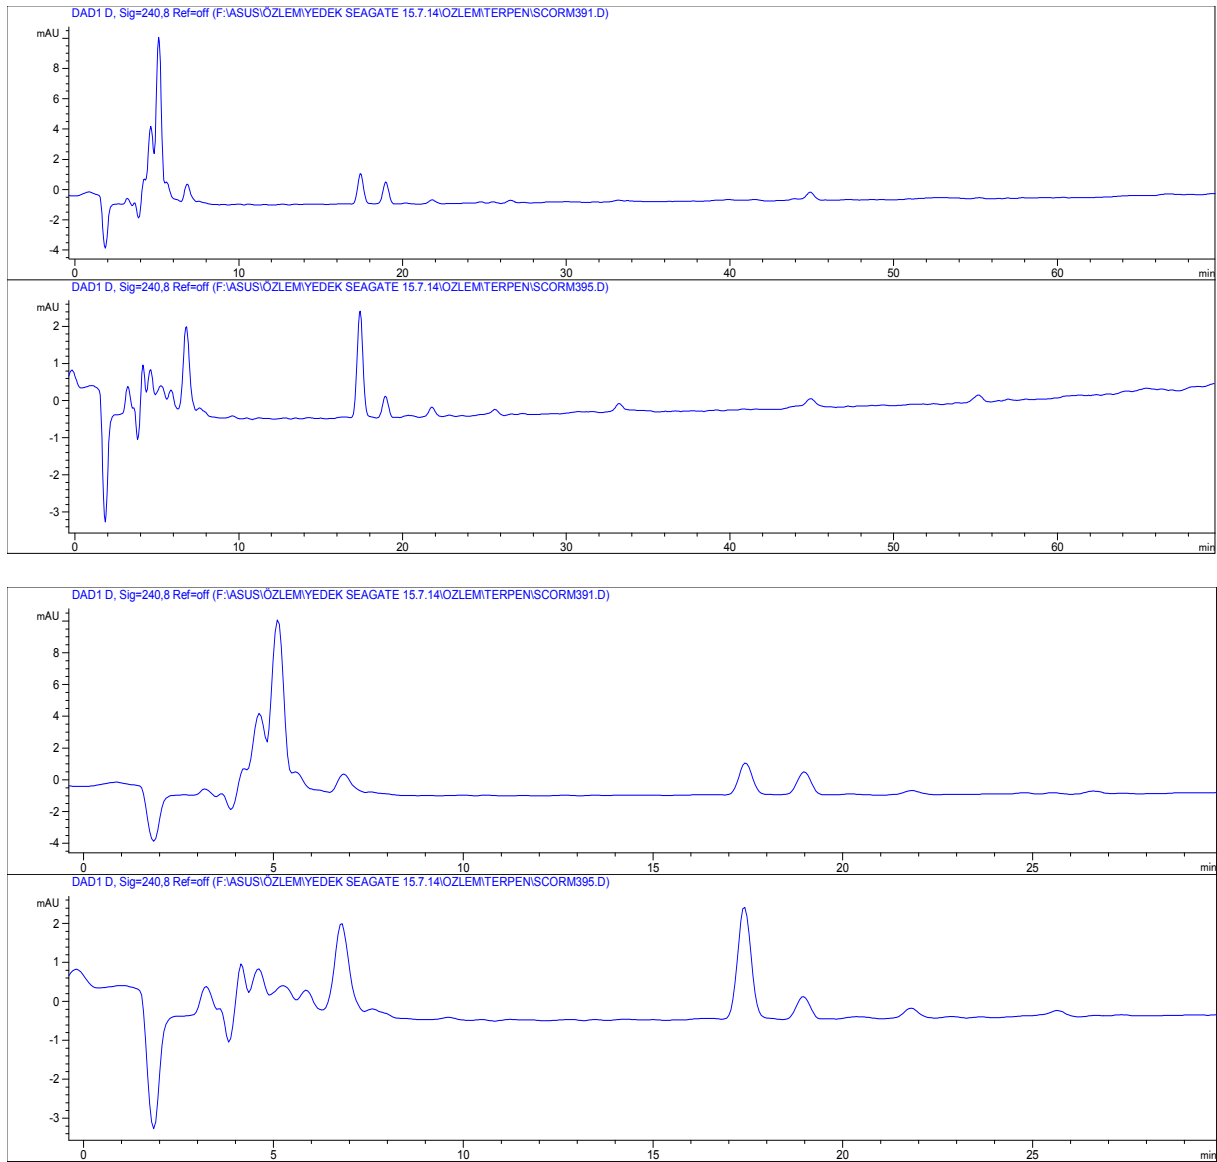

**Figure S36:** HPLC chromatograms of *S. acuminata* root (upper) and aerial (lower) part extract ( $\lambda$  200 and 240 nm)

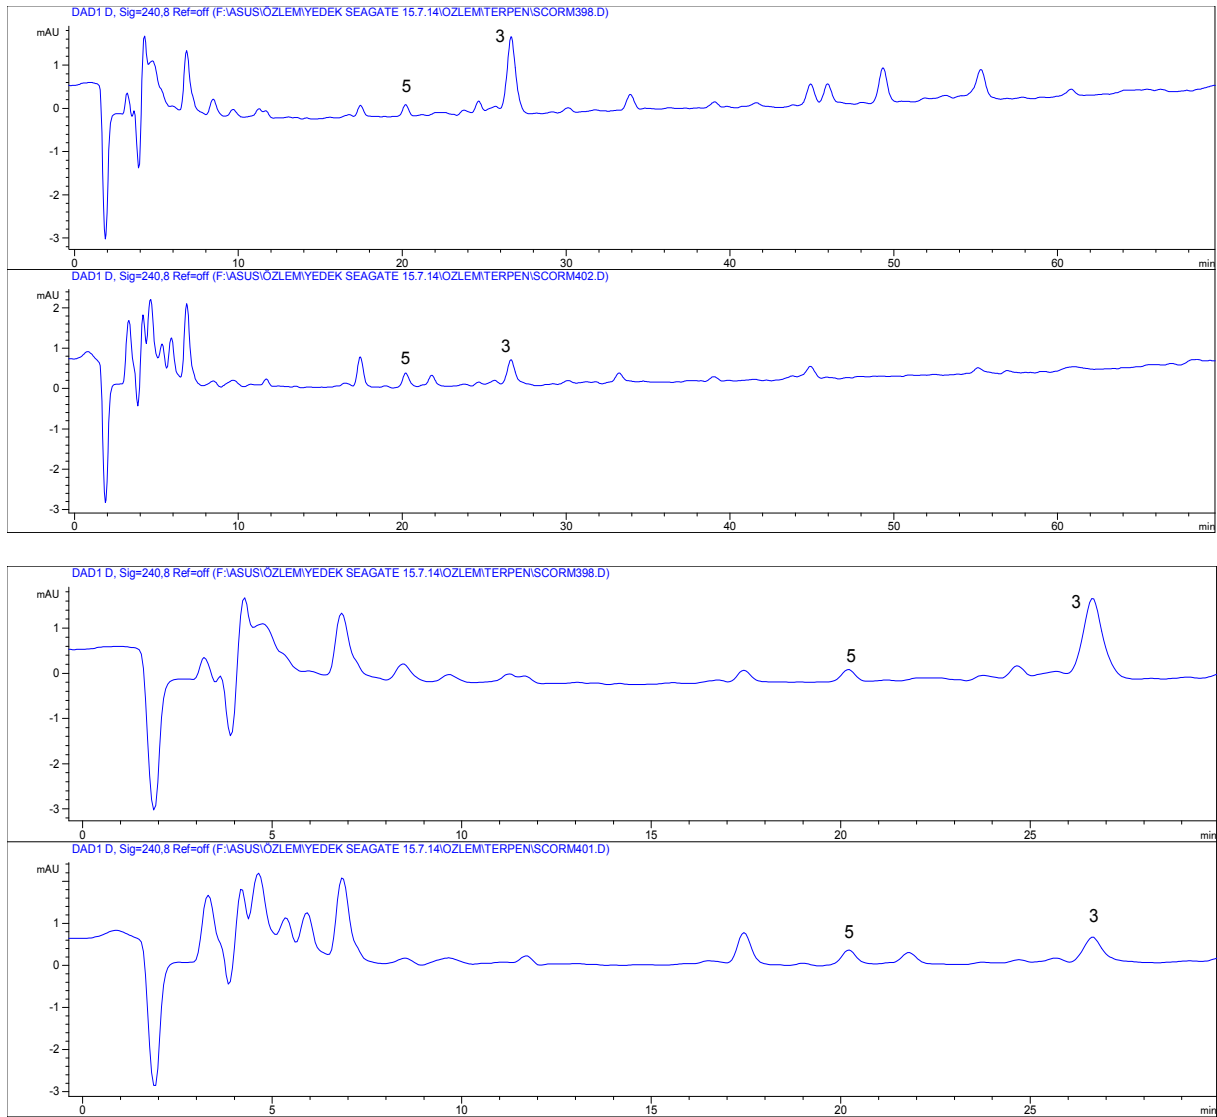

**Figure S37:** HPLC chromatograms of *S. laciniata* ssp. *laciniata* root (upper) and aerial (lower) part extract ( $\lambda$  200 and 240 nm)



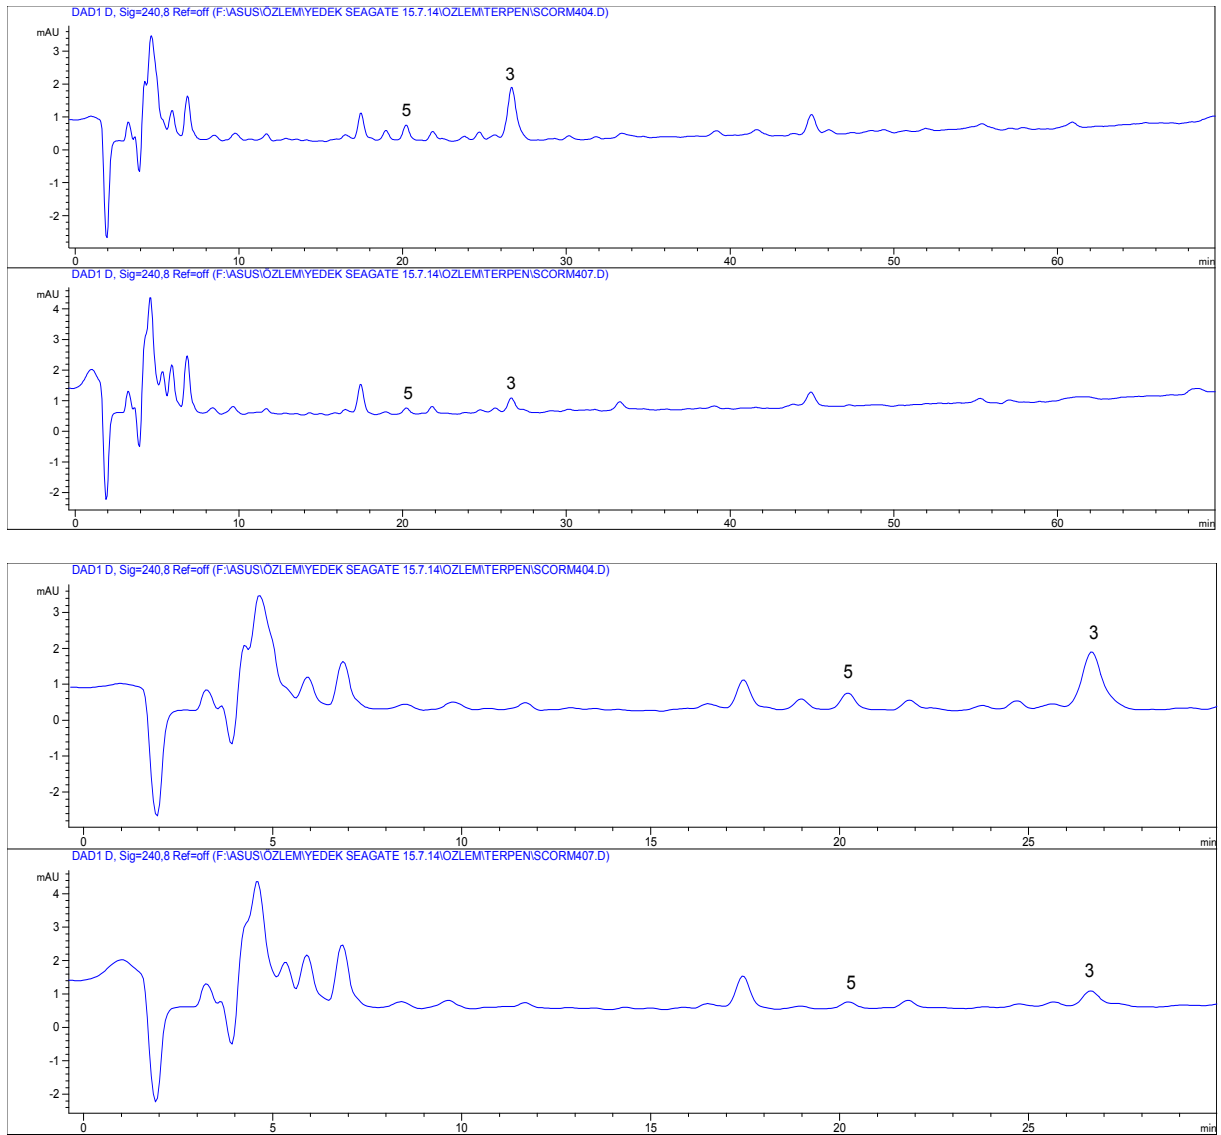

**Figure S38:** HPLC chromatograms of *S. cana* var. *jacquiniana* root (upper) and aerial (lower) part extract ( $\lambda$  200 and 240 nm)
